# Supplementary material for: SLC35B4, an Inhibitor of Gluconeogenesis, Responds to Glucose Stimulation and Downregulates Hsp60 among Other Proteins in HepG2 Liver Cell Lines
Source: Molecules. 2018 Jun 4;23(6):1350. doi: 10.3390/molecules23061350 (PMC6100323; doi:10.3390/molecules23061350)
Supplement: Supplementary file 1 [file molecules-23-01350-s001.xlsx]

## Sheet: entity
Name	Type	Description	Connectivity	Local Connectivity	Indegree	Outdegree	Owner	Organism	Swiss-Prot Accession
CDH5	Protein	cadherin 5, type 2 (vascular endothelium)	795	4	4	0		Homo sapiens, Mus musculus, Rattus norvegicus	P33151, P55284, O35542, Q4VAI5, Q4VAI6
FKBP1A	Protein	FK506 binding protein 1A, 12kDa	447	2	2	0		Homo sapiens, Mus musculus, Rattus norvegicus	P62942, Q0VDC6, P26883, Q62658, D3DVW6, P20071, Q4VC47, Q6FGD9, Q6LEU3, Q9H103 <more data available...>
SLC2A1	Protein	solute carrier family 2 (facilitated glucose transporter), member 1	1127	11	7	4		Homo sapiens, Mus musculus, Rattus norvegicus	P11166, Q59GX2, P17809, P11167, Q61608, Q6GTI3, A8K9S6, B2R620, D3DPX0, O75535 <more data available...>
LTF	Protein	lactotransferrin	1248	4	2	2		Homo sapiens, Mus musculus, Rattus norvegicus	P02788, E7ER44, P08071, D3ZAB1, P70690, Q61799, Q8CBA0, Q922P2, B2MV13, B7Z4X2 <more data available...>
ABCC8	Protein	ATP-binding cassette, sub-family C (CFTR/MRP), member 8	301	6	1	5		Homo sapiens, Mus musculus, Rattus norvegicus	Q09428, B2RUS7, Q09429, A6NMX8, E3UYX6, O75948, Q16583, O54989, P70532, Q9EQT0
ENO1	Protein	enolase 1, (alpha)	336	1	1	0		Homo sapiens, Mus musculus, Rattus norvegicus	E2DRY6, P06733, P17182, Q5FW97, P04764, Q5BJ93, B2RD59, P22712, Q16704, Q4TUS4 <more data available...>
ACADS	Protein	acyl-CoA dehydrogenase, C-2 to C-3 short chain	71	1	0	1		Homo sapiens, Mus musculus, Rattus norvegicus	E5KSD5, P16219, E9PE82, Q07417, P15651, Q6IMX3, P78331, Q91W85
DHFR	Protein	dihydrofolate reductase	413	5	2	3		Homo sapiens, Mus musculus, Rattus norvegicus	B0YJ76, P00374, B4DDD2, P00375, Q544T5, B0BMV8, Q920D2, P70693, Q61485, Q61487 <more data available...>
GCK	Protein	glucokinase (hexokinase 4)	557	10	4	6		Homo sapiens, Mus musculus, Rattus norvegicus	P35557, Q53Y25, P52792, Q5SVI5, Q64596, P17712, P17711, P52791, A4D2J2, A4D2J3 <more data available...>
PGK1	Protein	phosphoglycerate kinase 1	155	2	2	0		Homo sapiens, Mus musculus, Rattus norvegicus	P00558, B4E1H9, B7Z7A9, P09411, P16617, Q5M945, Q6P508, A8K4W6, Q5J7W1, Q6IBT6 <more data available...>
UGDH	Protein	UDP-glucose 6-dehydrogenase	83	3	2	1		Homo sapiens, Mus musculus, Rattus norvegicus	O60701, O70475, Q3TS38, O70199, B3KUU2, B4DN25, O60589
SLC35B4	Protein	solute carrier family 35 (UDP-xylose/UDP-N-acetylglucosamine transporter), member B4	6	1	0	1		Homo sapiens, Mus musculus, Rattus norvegicus	Q969S0, Q8CIA5, D3ZAN4, A4D1P3, A6NNS4, Q53GQ7, Q8TCU7, Q96K33, Q3TQU7, Q5U681 <more data available...>
E2F1	Protein	E2F transcription factor 1	1572	8	5	3		Homo sapiens, Mus musculus, Rattus norvegicus	Q01094, Q9BSD8, Q547J6, Q61501, G3V854, O09139, Q80VZ3, Q13143, Q92768
SP1	Protein	Sp1 transcription factor	3063	16	4	12		Homo sapiens, Mus musculus, Rattus norvegicus	E4Z9M7, P08047, G5E9M8, G3X8Q0, O89090, Q01714, Q8K4R0, O89087, Q62251, Q64167 <more data available...>
TUBA1A	Protein	tubulin, alpha 1a	54	4	4	0		Homo sapiens, Mus musculus, Rattus norvegicus	Q71U36, P68369, P68370, P02551, P05210, P05212, Q6P6G6, A8K0B8, G3V1U9, P04687 <more data available...>
HSPA8	Protein	heat shock 70kDa protein 8	884	11	2	9		Homo sapiens, Mus musculus, Rattus norvegicus	P11142, Q53HF2, P63017, P63018, P08109, P12225, Q4FZY7, Q62373, Q62374, Q62375 <more data available...>
HSPD1	Protein	heat shock 60kDa protein 1 (chaperonin)	987	12	1	11		Homo sapiens, Mus musculus, Rattus norvegicus	P10809, P63038, P63039, B2R5M6, Q38L19, Q9UCR6, P19226, P19227, P97602, Q3KQP2 <more data available...>
GSK3B	Protein	glycogen synthase kinase 3 beta	3096	18	6	12		Homo sapiens, Mus musculus, Rattus norvegicus	P49841, Q6FI27, Q5KU03, Q9WV60, P18266, D3DN89, Q9BWH3, Q9UL47
Diabetes Mellitus, Type 2	Disease		862	5	5	0
glucose-1-phosphate	Small Molecule		70	1	0	1
ER unfolded protein response	Cell Process		748	4	4	0
ethanol	Small Molecule		3496	13	0	13
UTP	Small Molecule		519	1	0	1
metabolic stress	Disease		162	3	3	0
Diabetes, Autoimmune	Disease		198	2	2	0
UDP-glucose	Small Molecule		179	4	4	0
UTP-glucose-1-phosphate uridylyltransferase	Functional Class		58	2	0	2

## Sheet: relationship
Relation	Type	Sentence	TextRef	Connectivity	# of References	Owner	Found In Pathways	Organ
UGDH ->-> UDP-glucose	ChemicalReaction	UDP-glucose dehydrogenase (UGDH) catalyzes two oxidations of UDP-glucose to yield UDP-glucuronic acid., UDP-glucose dehydrogenase catalyzes the NAD+-dependent twofold oxidation of UDP-glucose to give UDP-glucuronic acid., The enzyme UDP-glucose dehydrogenase catalyzes the NAD+-dependent 2-fold oxidation of UDP-glucose and provides a source of the acid., UDP-glucose dehydrogenase (UGDH) oxidizes U…	info:pmid/16158268#abs:1, info:pmid/15044486#abs:1, info:pmid/14686915#abs:1, info:pmid/9013585#abs:2, info:pmid/19244115#abs:1, info:pmid/21536136#abs:2, info:pmid/17442666#abs:1, info:pmid/19691674#abs:1, info:pmid/557038#abs:1, info:pmid/17073734#abs:1 <more data available...>	2	32		interaction	Liver {Organ urn:agi-ncimorgan:CL384198}, Skeletal system {Organ urn:agi-ncimorgan:C1283922}
SP1 ---> DHFR	PromoterBinding	The dihydrofolate reductase (dhfr) promoter contains cis-acting elements for Sp1 and E2F., We have determined the effect of intermolecular triplex DNA formation on Sp1 binding to the DHFR promoter., The dihydrofolate reductase (DHFR) gene (dhfr) promoter contains cis-acting elements for the transcription factors Sp1 and E2F., We report here that Sp1 binds to these regions in the dhfr promoter, an…	info:pmid/12788094#abs:1, info:pmid/1597451#abs:2, info:pmid/9363748#abs:1, info:pmid/3945313#abs:5, info:pmid/10196209#body:307, info:pmid/18364237#body:72, info:pmid/23137637#body:67, info:pmid/11336792#body:123, info:pmid/11598016#body:64, info:pmid/18804698#body:135 <more data available...>	2	16		interaction
GCK ---> Diabetes Mellitus, Type 2	Regulation	Heterozygous GCK mutations cause maturity-onset diabetes of the young ., Activation of glucokinase represents a promising concept for the treatment of type 2 diabetes., Mutations in the glucokinase (GCK) gene result in maturity-onset diabetes of the young ., Mutations in the glucokinase gene are a major cause of maturity-onset diabetes of the young., Mutations in the glucokinase (GCK) gene are th…	info:pmid/21518409#abs:2, info:pmid/16980436#abs:2, info:pmid/22289546#abs:1, info:pmid/8349034#abs:1, info:pmid/22335469#abs:1, info:pmid/11106831#abs:1, info:pmid/23957911#abs:2, info:pmid/1485947#abs:7, info:pmid/7983801#abs:2, info:pmid/22525692#abs:4 <more data available...>	2	100		Proteins Involved in Pathogenesis of Diabetes Mellitus Type 2, interaction	Liver {Organ urn:agi-ncimorgan:CL384198}, Fetus {Organ urn:agi-ncimorgan:C1305737}, Iris {Organ urn:agi-ncimorgan:C0022077}, Islets of Langerhans {Organ urn:agi-ncimorgan:C0022131}, Cardiovascular system {Organ urn:agi-ncimorgan:C1269562}, Pancreas {Organ urn:agi-ncimorgan:C1278931}, Pancreatic Acinus {Organ urn:agi-ncimorgan:C1280423}
GSK3B ---> Diabetes Mellitus, Type 2	Regulation	Glycogen Synthase Kinase 3beta is one of the important targets in the treatment of type II diabetes and Alzheimer's disease., Glycogen synthase kinase 3beta (GSK3beta) is a well-known marker and potential therapeutic target in non-insulin-dependent diabetes mellitus and Alzheimer's disease., GSK-3 remains an important target for interventions designed to improve insulin action in obesity-associat…	info:pmid/18929433#abs:1, info:pmid/17652946#abs:1, info:pmid/20594161#abs:9, info:pmid/23047001#abs:1, info:pmid/21862498#abs:12, info:pmid/23583197#body:11, info:pmid/23931441#cont:72, info:pmid/14690613#body:157, info:pmid/19135095#body:50, info:pmid/21886796#cont:53 <more data available...>	2	17		Proteins Involved in Pathogenesis of Diabetes Mellitus Type 2, interaction	Liver
SP1 ---> SLC2A1	PromoterBinding	We conclude that the consensus Sp1 site located in the rat proximal Glut1 promoter is necessary and sufficient for basal expression of the Glut1 gene, as well as for its response to hyperosmolarity., Electrophoretic mobility shift assays demonstrate that the transcription factor Sp1, a trans-activator of GLUT-1 promoter, binds to the -102/-82 region of GLUT-1 promoter during the fetal state but n…	info:pmid/16162661#abs:7, info:pmid/10364200#abs:5, info:pmid/9148896#abs:4, info:pmid/18226599#body:86, info:pmid/11090961#body:82, info:pmid/9148898#body:258, info:pmid/17872376#body:60, info:pmid/11278386#body:338, info:doi/10.1006/jmbi.1999.3216#body:137	2	9		interaction	Fetus {Organ urn:agi-ncimorgan:C1305737}
UDP-glucose <-<- UTP-glucose-1-phosphate uridylyltransferase	ChemicalReaction	UGPase reversibly catalyses the formation of UDP-glucose and is critical in carbohydrate metabolism., UDP-glucose pyrophosphorylase catalyzes the synthesis of UDP-glucose, an essential metabolite in all living organisms., The formation of UDP-glucose is catalyzed by UDP-glucose pyrophosphorylase , which is highly conserved among eukaryotes., UDP-Glc pyrophosphorylase (EC 2.7.7.9) catalyses the in…	info:pmid/22132858#abs:2, info:pmid/15272173#abs:1, info:pmid/17010990#abs:3, info:pmid/8631325#abs:1, info:pmid/16289256#abs:1, info:pmid/15469740#abs:1, info:pmid/9295324#abs:3, info:pmid/16085866#abs:7, info:pmid/22008983#abs:5, info:pmid/19286968#abs:5 <more data available...>	2	32		interaction	head {Organ urn:agi-ncimorgan:C0018670}, Pancreas {Organ urn:agi-ncimorgan:C1278931}, Immune system {Organ urn:agi-ncimorgan:C0020962}
HSPD1 ---| Diabetes, Autoimmune	Regulation	Immunity to hsp65 can cause autoimmune diabetes in mice and may be related to autoimmune arthritis in rats and humans, so immunity to hsp65 should be forbidden; yet healthy persons manifest T-cell responses to self-hsp65., Therefore, it has been suggested that the anti-hsp60 T cells involved in the autoimmune diabetes of NOD mice might reflect molecular mimicry between Mycobacterial-hsp60 and a b…	info:pmid/1680347#abs:3, info:pmid/8738959#abs:3, info:pmid/8772717#title:1, info:pmid/15053897#body:156, info:doi/10.1016/S0039-6060(98)70130-8#body:117	2	5		interaction	Lymph Nodes {Organ urn:agi-ncimorgan:C0154054}
HSPA8 ---> ER unfolded protein response	Regulation	Conversely, HSP72/73 was found to be down-regulated, resulting probably from the endoplasmic reticulum unfolded protein response as previously reported [Skandrani, D., Gaubin, Y., Vincent, C., Beau, B., Murat, J.C., Soleilhavoup, J.P., Croute, F., 2006. Relationship between toxicity of selected insecticides and expression of stress protein (HSP, GRP) in cultured human cells: effects of commercial…	info:pmid/16884889#abs:12, info:pmid/21982219#body:61	2	2		Neighbors of ER unfolded protein response, interaction	Lung {Organ urn:agi-ncimorgan:C1278908}
ABCC8 ---> Diabetes Mellitus, Type 2	Regulation	ABCC8 mutations can cause MODY in patients whose clinical features are similar to those with HNF1A/4A MODY., The high-affinity sulfonylurea receptor (SUR1) gene regulates insulin secretion and may play a role in type 2 diabetes., We conclude that in Caucasians, the SUR locus may contribute to the genetic susceptibility to NIDDM and obesity., ABCC8 exons 16 and 31 variants increase susceptibility …	info:pmid/21989597#abs:10, info:pmid/9799081#abs:1, info:pmid/9075812#abs:10, info:pmid/22704848#abs:10, info:pmid/18758683#abs:7, info:pmid/22210575#title:1, info:pmid/23255597#cont:33, info:pmid/12437993#body:122, info:pmid/22714048#cont:44, info:pmid/12475777#body:51 <more data available...>	2	14		Proteins Involved in Pathogenesis of Diabetes Mellitus Type 2, interaction	Pancreas
HSPD1 ---> Diabetes Mellitus, Type 2	Regulation	This study was the first epidemiological study to demonstrate an association between type 2 diabetes mellitus and HSP60, thus suggesting that HSP60 may play an important role in the type 2 diabetes mellitus pathology., HSP60 may also play a role in the regulation of mitochondrial function in type 2 diabetes and obesity., Our study is the first demonstrating that Hsp60 might also be a relevant med…	info:pmid/19576649#abs:9, info:pmid/24084737#cont:27, info:pmid/22315307#cont:256	2	3		Neighbors of Diabetes Mellitus, Type 2, interaction
SP1 --+> LTF	PromoterBinding	The presence of a C/EBP site flanked by 2 Sp1 sites within this segment of the lactoferrin promoter prompted us to investigate the possible role of these sites in lactoferrin expression., The lactoferrin promoter is activated by C/EBPs and Sp1 and is repressed by CDP (Khanna-Gupta et al., 1997, 2000)., ... proposed for T3 suppression of Sp1-dependent transcription of the epidermal growth factor r…	info:pmid/10845904#abs:3, info:pmid/12032776#body:105, info:pmid/14715929#body:221, info:pmid/12565886#body:6, info:pmid/15935571#body:106, info:pmid/11337508#body:328, info:pmid/22989549#body:191	2	7		interaction	Bone Marrow {Organ urn:agi-ncimorgan:C0005953}, Fingers {Organ urn:agi-ncimorgan:C0016129}
SLC2A1 ---> Diabetes Mellitus, Type 2	Regulation	We conclude that the GLUT1 gene is unlikely to play a role in the aetiology of non-insulin-dependent diabetes mellitus and obesity., Our results suggest that the T8356C and GLUT1 gene mutations may have an important role in developing late-onset type 2 diabetes in Coimbatore population., The present study does not support the hypothesis that genetic variation within the GLUT1 or GLUT4 gene loci m…	info:pmid/9600248#abs:8, info:pmid/20730618#abs:11, info:pmid/1348023#abs:7, info:pmid/8904924#abs:5, info:pmid/11485019#abs:10, info:pmid/7516306#abs:9, info:pmid/23894862#abs:5, info:pmid/24030250#abs:1, info:pmid/22795339#body:69, info:pmid/9789717#body:5	2	10		Proteins Involved in Pathogenesis of Diabetes Mellitus Type 2, interaction
E2F1 ---> TUBA1A	PromoterBinding	Consistent with the lack of E2F site occupancy of the repressed TUBA3 promoter, we were unable to detect significant E2F6 (or E2F1) binding to the TUBA3 promoter in wild-type fibroblasts by chromatin immunoprecipitation ( B).	info:pmid/15936277#body:67	2	1		interaction
E2F1 --+> SP1	PromoterBinding	We demonstrate that at least two overlapping E2F1/Sp1 binding sites are present in the p14ARF promoter, and E2F1 activates the promoter through displacing constitutive Sp1 from the overlapping sites., Our results suggest that E2F1 regulates SRC-3 expression through interacting with Sp1 and SRC-3., However, we were unable to show that E2F1 binds the SP1 promoter or that E2F1, 2, 3, or 5 were able …	info:pmid/19115249#abs:4, info:pmid/16916939#body:272, info:pmid/21248772#cont:331, info:pmid/16300731#body:84, info:pmid/23433354#cont:215	2	5		interaction
SP1 ---> E2F1	PromoterBinding	Gel mobility shift assays with multiple oligonucleotides and protein antibodies (for supershifts) showed that the -146 to -54 region of the E2F1 gene promoter bound Sp1 and NF-Y proteins in MCF-7 cells., Using chromatin immunoprecipitation experiments, we showed that COUP-TFII directly regulates the expression of E2F1 through tethering to the Sp1 binding sites in the promoter of E2F1 to modulate …	info:pmid/10446910#abs:3, info:pmid/22734039#abs:5, info:pmid/9218478#body:199, info:pmid/12947120#body:228, info:pmid/12511608#body:147, info:pmid/18206366#body:170, info:pmid/12697671#body:240, info:pmid/21248772#cont:131, info:pmid/10660616#body:322, info:pmid/17909268#body:269	2	10		interaction	Thymus Gland {Organ urn:agi-ncimorgan:C1306748}
SP1 ---> UGDH	PromoterBinding	Six Sp1 sites located in the proximal 550 bp of the UGDH gene promoter appear to determine basal promoter activity, as does a previously unrecognized 49-bp sequence spanning -1436 nucleotides and -1388 nucleotides that negatively affects activity., The UGDH core promoter contains twelve Sp1 consensus sequences., Also, hypoxia reduces the binding of Sp1 to the UDP-glucose dehydrogenase promoter .	info:pmid/21576248#abs:5, info:pmid/12682078#body:335, info:pmid/17307335#body:19	2	3		interaction	Ocular orbit {Organ urn:agi-ncimorgan:C0029180}, Fingers {Organ urn:agi-ncimorgan:C0016129}
SP1 ---> TUBA1A	PromoterBinding	However, we could readily detect binding of the transactivating factors E2F1 and Sp1 to the TUBA3 gene promoter in E2F6 -/- mouse embryonic fibroblasts ( B), which is again in close agreement with the in vivo footprinting pattern and the activity of the TUBA3 promoter in these cells.	info:pmid/15936277#body:68	2	1		interaction
HSPD1 ---> metabolic stress	Regulation	GroES/EL (Hsp60 family) and DnaK/DnaJ (Hsp70 family) are involved in the heat-shock response to metabolic stress and aid in protein folding and maintaining export-competency .	info:pmid/10617931#body:32	2	1		interaction
SP1 ---> HSPA8	PromoterBinding	The hsc73 promoter contains putative binding sites for transcription factor Sp1, two CCAAT boxes and, surprisingly, two matches to the consensus heat-shock regulatory element., In summary, our results indicate that a consensus Sp1-binding site is crucial for ethanol responsiveness of the hsc70 promoter., A cis-acting region and Sp1 consensus binding site in the HSC70 promoter region are required …	info:pmid/3595567#abs:5, info:pmid/10604945#body:320, info:pmid/22960394#body:148	2	3		interaction	Gastric mucosa {Organ urn:agi-ncimorgan:C0017136}
GSK3B ---> metabolic stress	Regulation	Compared with control, transfection with constitutively active GSK3ß (GSK3ß-S9A) increased total GSK3ß content before, during, and after metabolic stress (Figure 2B), without marked differences in p-serine9 GSK3ß content between the two groups (Figure 2A) as detected with a phospho-serine9-specific GSK3ß antibody., Additionally, since mitochondrial biogenesis is a well-known adaptive response to …	info:pmid/20093356#body:61, info:pmid/24316184#body:21	2	2		interaction	Aorta {Organ urn:agi-ncimorgan:C1278934}
ACADS ---- HSPD1	Binding	In vitro studies have shown that interaction of Hsp60 with SCAD is crucial for correct folding of the latter., The levels of tetramer and hsp60-complexed SCAD were normalized with respect to the total amount of soluble radiolabeled SCAD protein in the entire lane of the native gel (36, 37).	info:pmid/18571143#body:204, info:pmid/14506246#body:191	2	2		interaction
HSPA8 ---- SLC2A1	Binding	However, the newly synthesized GLUT1 may bind to Hsc70 that is known to exist in reticulocyte lysates.	info:pmid/15708368#body:199	2	1		interaction
DHFR ---- HSPD1	Binding	In vitro, Hsp60 bound to DHFR in the course of thermal denaturation, preventing its aggregation, and mediated its adenosine triphosphate-dependent refolding at increased temperatures., Hydrolysis of ATP is also not required for DHFR release since certain nonhydrolyzable analogues are capable of partial discharge. "Native" DHFR can also form a stable complex with chaperonin 60., Instead, we found …	info:pmid/1359644#abs:5, info:pmid/1680394#abs:5, info:pmid/21989011#cont:55, info:pmid/9291133#body:200, info:pmid/9030576#body:60, info:pmid/10716630#body:6	2	6		interaction
GSK3B ---> CDH5	Regulation	VE-cadherin participate in forming the complex and can be modulated by GSK-3ß [49]., hepatocyte growth factor-mediated inhibition of GSK-3ß in ECs also improves ß-catenin and VE-cadherin linkage to the cytoskeleton ( )., Furthermore, insulin-like growth factor-1-induced VE-cadherin down-regulation and membrane permeability are reversed by stable expression of a constitutively active GSK-3ß in whi…	info:pmid/21557011#cont:188, info:pmid/20849862#body:162, info:pmid/21549192#body:133	2	3		interaction	Carotid Arteries {Organ urn:agi-ncimorgan:C0007272}, Dermis {Organ urn:agi-ncimorgan:C0011646}, Retina {Organ urn:agi-ncimorgan:C1962966}
SP1 --+> ABCC8	PromoterBinding	We conclude that sequential activation of two transcription factors, HIF and Sp1, is required to stimulate transcription of Abcc8 following cerebral ischemia., The transcription factor, specificity protein 1, which regulates expression of SUR1 and caspase-3, was activated in the hippocampus 15 minutes after injury., Sequence analysis of the SUR1 promoter revealed multiple putative SP1 sites (Fig.…	info:pmid/22086197#abs:7, info:pmid/21107131#abs:4, info:pmid/10373428#body:212, info:pmid/22714048#cont:206	2	4		interaction	Brain {Organ urn:agi-ncimorgan:C1269537}, Hippocampus {Organ urn:agi-ncimorgan:C0019564}
ABCC8 ---> SP1	Regulation	Several transcription factors, including Sp1, FoxA2/ HNF3b, Beta2/NeuroD, and STAT3, have been implicated in transcription of Abcc8 in pancreatic b cells (Ashfield and Ashcroft, 1998; Hernandez-Sanchez et al, 1999; Kim et al, 2002; Gorogawa et al, 2004; Lantz et al, 2004)., Several transcription factors, including Sp1, FoxA2/HNF3b, b2/ NeuroD, and STAT3, were implicated in transcription of Abcc8 …	info:pmid/22714048#cont:203, info:pmid/22086197#cont:259, info:doi/10.1016/j.neulet.2012.01.080#body:71	2	3		interaction
GSK3B ---> E2F1	ProtModification	We previously reported that GSK3beta is able to phosphorylate E2F1 in vitro at Ser403 and Ser433., The phosphorylation of E2F1 by GSK3ß suggested that the two proteins physically interact., Interestingly, E2F1 was recently proved to be phosphorylated by GSK3ß (33)., E2F1 is directly phosphorylated by several cellular protein kinases, including glycogen synthase kinase-3ß, ATM (ataxia telangiectas…	info:pmid/20447425#abs:2, info:pmid/17050006#body:115, info:pmid/18367454#body:336, info:pmid/21624405#body:111	2	4		interaction
GSK3B ---| E2F1	Expression	This affirmation is based on evidence that inhibition of GSK3ß blocks pRb phosphorylation and E2F-1 expression., These data reveal a second pathway where GSK3ß directly regulates E2 factor activity by physical interaction with the transactivation domain of E2F1., If GSK3ß overexpession were to reduce E2F1 level in HEK293 cells, then the cell proliferation rate should be reduced.	info:pmid/17612578#body:184, info:pmid/17050006#body:209, info:pmid/18367454#body:223	2	3		interaction
HSPA8 --+> ENO1	Regulation	It was further shown that Hsc70-overexpression alleviated the H(2)O(2)-induced decrease of a-enolase activity and cell damage, and Hsc70 deficiency aggravated the decrease of a-enolase activity and cell damage in H(2)O(2) treated H9c2 cells., At PIM1, ENO1, CCNB1, and UBA52, which are activated by Myc and HSP90AA1 and HSPA8, which are activated by HSF, depletion of Dcp2, or Xrn2+TTF2, increased p…	info:pmid/21958194#abs:6, info:pmid/22483619#body:99, info:doi/10.1016/j.molcel.2012.03.006#body:99	2	3		interactome, interaction
GSK3B ---| SLC2A1	Expression	Conversely, expression of a constitutively active form of GSK-3beta resulted in at least a twofold decrease in GLUT1 expression and glucose uptake., It has been demonstrated that the inhibition of GSK-3ß can up-regulate glucose transporter (GLUT) expression in several cell lines ( )., In addition, IFNa2b activated p-GSK-3ß and p-mTOR inhibited the expression of Glut-1 in both a dose-dependent and…	info:pmid/18650261#abs:5, info:pmid/23541490#body:187, info:pmid/22627699#cont:118, info:pmid/12764143#body:303, info:pmid/19591936#body:161, info:pmid/22750268#body:92, info:pmid/22013558#cont:779	2	7		interaction	Brain {Organ urn:agi-ncimorgan:C1269537}
SLC2A1 ---> GSK3B	Regulation	Phosphorylation of Akt and GSK-3 was enhanced by glucose metabolism or overexpression of the glucose transporter, GLUT1, and was prevented by glycolytic inhibition., Indeed, the phosphorylated form of GSK3ß was significantly increased in GLUT1 overexpressing cells under fully supplemented conditions (Fig. 8A) as well as after 6 h of serum withdrawal (Fig. 8B)., Akt may regulate GLUT1 expression t…	info:pmid/12200436#abs:5, info:pmid/11334423#body:245, info:pmid/17645414#body:167, info:pmid/19130886#body:92	2	4		interaction	Umbilical Blood {Organ urn:agi-ncimorgan:C1550673}
GSK3B ---| GCK	Expression	Figure 6 Acute inhibition of GSK3 is not sufficient to induce FASN and GCK mRNA expression.	info:pmid/16834571#body:540	2	1		interaction
GCK ---| GSK3B	Regulation	To address the role of GSK3 in an in vitro experimental system, GSK3a and GSK3ß were blocked pharmacologically by LiCl, and GCK flux was assessed.	info:pmid/23823480#body:55	2	1		interaction	Liver {Organ urn:agi-ncimorgan:CL384198}
GSK3B --+> GCK	MolTransport	The inability of the GSK3 inhibitor LiCl to block the insulin effect on GCK flux, combined with the in vivo data using the GSK3aS21A/S21A;ßS9A/S9A mice, provide compelling evidence that the enhanced conversion of glucose to glycogen is not mediated by phosphorylation of GSK3a and GSK3ß.	info:pmid/23823480#body:89	2	1		interaction	Liver {Organ urn:agi-ncimorgan:CL384198}
GSK3B ---> SP1	Regulation	Overexpression of Snail1 and inhibition of glycogen synthase kinase-3ß in colorectal tumor cells markedly induced the activity of Sp1 transcription factor, which plays a key role in the upregulation of NKG2D ligand expression during Epithelial-mesenchymal transition., GSK3ß-mediates phosphorylation of Sp1 on Ser728 and Ser732, leading to Sp1 protein stabilization in prostate cancer cells ( ).	info:pmid/23509364#abs:4, info:pmid/22835698#body:48	2	2		interaction
E2F1 ---> DHFR	PromoterBinding	In some cases, we also observed that E2F1 was bound to the p180 and dihydrofolate reductase promoters along with E2F3., The DHFR-Gal4 reporter plasmid contains a Gal4-binding site in precise replacement of the E2F1-binding site in the DHFR promoter., We have also shown that E2F1 can bind to the dhfr promoter in vivo 2 and that E2F1 is a robust activator ofdhfr transcription (29, 62)., Evidently, …	info:pmid/15014447#body:174, info:pmid/11713253#body:192, info:pmid/10336493#body:244, info:pmid/10597240#body:136, info:pmid/16046414#body:125, info:pmid/17690688#body:271, info:pmid/23833190#cont:377, info:pmid/10818092#body:40	2	8		interaction
SP1 --+> GCK	PromoterBinding	Transient transfection experiments performed in HepG2 cells and electrophoretic mobility shift assays denoted that Sp1 binds and transactivates GCK promoter, whereas Sp3 repressed Sp1-mediated activation of GCK by competing for the same binding site., Sp1 has previously been demonstrated to enhance GCK transcription in gilthead sea bream (Sparus aurata) (20).	info:pmid/17446237#abs:6, info:pmid/19411616#body:200	2	2		interaction
SP1 ---> FKBP1A	Expression	The results indicated that the mutated promoters have no promoter activity ( ), indicating that the binding sequences for Sp1 and Ets-1 are essential for the promoters of FKBP12.6 and FKBP12, respectively.	info:pmid/16122887#body:96	2	1		interaction
ethanol ---> GSK3B	Regulation	The phosphatidylinositol 3-kinase/Akt signaling pathway is responsible for inactivation of GSK-3beta by ethanol., Available evidence indicates that the activity of GSK3beta in the central nervous system is affected by ethanol., Cyanidin-3-glucoside blocked ethanol-mediated GSK3ß activation by inducing phosphorylation at serine 9 while reducing the phosphorylation at tyrosine 216., More importantl…	info:pmid/19033378#abs:11, info:pmid/19507062#abs:11, info:pmid/21671257#abs:10, info:pmid/19384566#abs:8, info:pmid/18478238#abs:3, info:pmid/19393862#abs:12, info:pmid/19007447#title:1, info:pmid/15878157#body:119, info:pmid/21843598#body:6, info:pmid/21878650#cont:337 <more data available...>	2	20		interaction	Heart {Organ urn:agi-ncimorgan:C1281570}, Central Nervous System {Organ urn:agi-ncimorgan:C0927232}, Brain {Organ urn:agi-ncimorgan:C1269537}, prefrontal cortex {Organ urn:agi-ncimorgan:C0162783}, Hippocampus {Organ urn:agi-ncimorgan:C0019564}, Cerebellum {Organ urn:agi-ncimorgan:C1268981}, Liver {Organ urn:agi-ncimorgan:CL384198}, Nervous system {Organ urn:agi-ncimorgan:C0027763}
ethanol --+> HSPA8	Expression	In comparison with ethanol, propanol and butanol caused proportionally greater increases in Hsc70 mRNA., Ethanol (5 g/kg) increased the level of hsc73 and grp78 messenger ribonucleic acids and related proteins in the liver., Previously we found that ethanol increases expression of the constitutive 70-kDa heat shock protein (Hsc70) in NG108-15 neuroblastoma x glioma cells., These results suggest t…	info:pmid/1989992#abs:8, info:pmid/10630603#abs:9, info:pmid/7969074#abs:1, info:pmid/15251177#abs:5, info:pmid/22960394#body:147, info:pmid/10604945#body:47, info:pmid/19781570#body:96, info:pmid/21781791#body:96, info:pmid/11916533#body:41, info:pmid/11557303#body:112 <more data available...>	2	11		interaction	Liver {Organ urn:agi-ncimorgan:CL384198}, Midbrain {Organ urn:agi-ncimorgan:C0025462}, Gastric mucosa {Organ urn:agi-ncimorgan:C0017136}, Central Nervous System {Organ urn:agi-ncimorgan:C0927232}
ethanol ---> SLC2A1	Expression	Ethanol increased the uptake of monosaccharides and the protein levels of GLUT1 but decreased those of mannosidase II., not affect the GLUT1 protein level (Fig. 2b), which was due to stabilization of GLUT1 mRNA levels by ethanol exposure., Results from reverse transcription-polymerase chain reaction demonstrated that gene expressions of IGF-1 and GLUT 1 were down-regulated significantly in medium…	info:pmid/12390522#abs:7, info:pmid/21079922#cont:229, info:pmid/23907025#body:106	2	3		interaction	Brain {Organ urn:agi-ncimorgan:C1269537}
ethanol ---| SLC2A1	DirectRegulation	Ethanol, diazepam, and chloralhydrate significantly inhibited GLUT1 function., Exposure to 50 and 100 mM of ethanol for 5 hr induced dose-dependent reductions in GLUT1 and GLUT3 protein., Indirect immunofluorescence and immunoperoxidase staining showed marked reduction of the GLUT1 glucose transporter by exposure to 100 mM ethanol for 5 or 18 hours, but no obvious change in response to 50 mM etha…	info:pmid/12548383#abs:8, info:pmid/8749801#abs:5, info:pmid/8979253#abs:3, info:pmid/15922140#body:136, info:pmid/23588303#cont:576, info:pmid/18498935#body:48, info:pmid/20382450#body:8	2	7		interaction	Brain {Organ urn:agi-ncimorgan:C1269537}, Cerebellum {Organ urn:agi-ncimorgan:C1268981}
ethanol ---> SLC2A1	MolTransport	Ethanol increased the uptake of monosaccharides and the protein levels of GLUT1 but decreased those of mannosidase II., We also determined the ethanol sensitivity of various cloned human facilitative glucose transporters expressed in Chinese hamster ovary cells and we found that ethanol inhibits hexose uptake by GLUT1 but not uptake by GLUT3 or GLUT4 transporters.	info:pmid/12390522#abs:7, info:pmid/8022421#abs:6	2	2		interaction
ethanol ---> GCK	Expression	Incubation of Saccharomyces cerevisiae with xylose and ethanol for 16 hours leads to a decrease of hexokinase (and glucokinase) activity in the cells., Ethanol perfusion decreased the levels of phosphofructokinase, glucokinase and cytosolic isocitrate dehydrogenase, while avenaciolide lowered pyruvate carboxylase and phosphoenolpyruvate carboxykinase as well as glucokinase., Specific blockade of …	info:pmid/3533151#abs:1, info:pmid/949510#abs:4, info:pmid/20855893#abs:4	2	3		interaction	Liver {Organ urn:agi-ncimorgan:CL384198}, Duodenum {Organ urn:agi-ncimorgan:C1278921}
ethanol --+> SP1	Expression	Expression of both Sp1 and NFkappaBialpha were also downregulated following chronic ethanol treatment., These results suggest that free fatty acid and ethanol may increase endoplasmic reticulum stress and lead to nuclear nuclear factor-?B activation and TG2 induction through respectively distinctive pathways, leading to TG2-mediated apoptosis via cross-linking and inactivation of Sp1 and reductio…	info:pmid/16594979#abs:11, info:pmid/21525755#abs:7, info:pmid/10604945#body:303, info:pmid/16806122#body:32, info:pmid/17575268#body:260, info:pmid/23592778#cont:268, info:pmid/14564680#body:168, info:pmid/19208340#body:102	2	8		interaction	Pancreas {Organ urn:agi-ncimorgan:C1278931}, Cerebellum {Organ urn:agi-ncimorgan:C1268981}, Fingers {Organ urn:agi-ncimorgan:C0016129}
ethanol ---| UGDH	Regulation	Ethanol (100 mM) partially inhibited UDPGDH activity assayed at low, but not high, UDP-glucose concentrations, supporting the conclusion that at least E(H) activity is not due to ADH., The mechanism is likely to be inhibition of UDP-glucose dehydrogenase activity by ethanol from increased intracellular NADH/NAD ratio accompanying ethanol oxidation., The microarray results obtained in this study r…	info:pmid/16453102#abs:9, info:pmid/3795046#abs:10, info:pmid/17920746#abs:7, info:pmid/23794036#cont:323	2	4		interaction	Liver {Organ urn:agi-ncimorgan:CL384198}
ethanol ---> PGK1	Expression	On the other hand, the level of PGK1 mRNA was hardly changed by the treatment with heat shock or ethanol stress., The ethanol yield on 4% xylose obtained by the engineered yeast from this study was low (0.23g ethanol/g xylose), which could be due to the lack of glucose to fully activate the PGK1 promoter used in the xylA construction as well as to increase the carbon flux through glycolysis.	info:pmid/18442359#body:115, info:pmid/23186665#body:52	2	2		interaction
SLC2A1 ---> ER unfolded protein response	Regulation	Previous publications have suggested that GLUT1 may modulate the endoplasmic reticulum stress response.	info:pmid/20051957#body:250	2	1		Neighbors of ER unfolded protein response, interaction
ABCC8 --+> metabolic stress	Regulation	This is supported by the observation that analogous mutations in the SUR1 isoform abolished the effect of ADP, but only reduced the action of openers or metabolic stress on channel activity (27) .	info:pmid/11023978#body:241	2	1		interaction
SP1 ---> CDH5	PromoterBinding	Supershift assays with antibodies against proteins of the Sp1 family revealed that Sp1 and Sp3 interact with this region of the VE cadherin promoter., PlGF-1 promotes VE-cadherin expression via the trans-activating Sp1 and Sp3 interaction with the VE-cadherin promoter and subsequently stabilizes transendothelial junctions, but only after activation of endothelial cells by VEGF., Sp1, TAL-1, and t…	info:pmid/9506975#abs:7, info:pmid/21464949#abs:4, info:pmid/24106276#cont:325, info:pmid/9506955#body:29	2	4		interaction
ABCC8 ---- GCK	Binding	... sulfonylurea receptor gene (SUR1) (2) or the SUR-associated, inward-rectifying, potassium channel (subunit KATPir6.2) (3) as well as autosomal dominant ...	info:pmid/10487673#body:63	2	1		interaction
GCK ---> SLC2A1	ProtModification	There is now strong evidence that in most of these cells, extracellular glucose is carried into the cytosol by GLUT, phosphorylated by glucokinase, and subsequently metabolized to generate ATP, which closes membrane ATP-sensitive K+ channels (KATP channels) and so electrically excites the cell (7,8,10).	info:pmid/18591392#body:59	2	1		interaction
GCK ---> SLC2A1	Expression	As with the glucokinase gene, the transcription factors mediating the effects of insulin via PKB on the expression of SREBP and GLUT-1 are not yet known, whereas upstream stimulatory factor has been implicated in mediating the effects of insulin on FAS gene expression (58)., Although Glut1 expression increased by 58% and Glut2 and glucokinase expression decreased by 31 and 23%, respectively, in h…	info:pmid/14612449#body:256, info:pmid/23974922#cont:163	2	2		interaction	Islets of Langerhans {Organ urn:agi-ncimorgan:C0022131}
DHFR ---- HSPA8	Binding	Co-precipitation with Hop TPR1 showed that prePiC-DHFR was clearly bound by Hsc70, whereas preCIC-DHFR was not bound above background levels (Figure 4).	info:pmid/19143589#body:166	2	1		interaction
DHFR ---> GSK3B	Regulation	To our knowledge, this is the first report of modulation of GSK3 activity by inhibition of DHFR.	info:pmid/19727391#body:249	2	1		interaction
ethanol --+> HSPD1	Regulation	Heat stress strikingly induced HSP70 (Fig. 4 C, lane 2), while ethanol and diamide mainly induced HSP60 (Fig. 4 D, lanes 3 and 5)., We noted that two genes (S100A4 and MME) are up regulated in the condition of 1 nM R1881 but down regulated in the ethanol condition comparing to the MOCK control, and one gene HSPD1 is up-regulated in the condition of 10 nM R1881 but down regulated in ethanol.	info:pmid/8636403#body:220, info:pmid/19668381#body:151	2	2		interaction
ethanol ---| LTF	MolTransport	Ethanol (200 mM) blocked both H202 and lactoferrin release, suggesting the involvement of the phospholipase D pathway., Similarly, ethanol treatment completely blocked H2O2 and lactoferrin release, and the second phase of diradylglycerol formation., Ethanol significantly inhibited lactoferrin, HGF, and MPO degranulation in a concentration-dependent manner.	info:pmid/8975881#abs:11, info:pmid/8132530#abs:10, info:pmid/12488495#body:130	2	3		interaction
HSPD1 --+> ER unfolded protein response	Regulation	The presence of OTCD in mitochondria and the associated induction of mitochondrial CPN60 demonstrated induction of mitochondrial unfolded protein response in the transfected cells.	info:pmid/21997551#cont:120	2	1		interaction
GSK3B ---> ER unfolded protein response	Regulation	An emerging role for GSK-3ß is regulation of endoplasmic reticulum stress response.	info:pmid/23108649#cont:8	2	1		interaction	Heart {Organ urn:agi-ncimorgan:C1281570}
HSPD1 ---| GSK3B	Regulation	Moreover, Hsp60 impaired insulin-stimulated phosphorylation of GSK3a and GSK3b (Fig. 5B and C).	info:pmid/22315307#cont:137	2	1		interaction
HSPA8 --+> Diabetes, Autoimmune	Regulation	Transgenic expression of Hsc70 in pancreatic islets enhances autoimmune diabetes in response to beta cell damage.	info:pmid/19812207#title:1, info:pmid/20668291#cont:171	2	2		interaction	Islets of Langerhans {Organ urn:agi-ncimorgan:C0022131}
HSPD1 --+> FKBP1A	Regulation	On the contrary, the DNA-binding response regulator [A9M2D6], involved in the transcription, the trigger factor [A1KUE0] involved in protein export, the 60 kDa chaperonin [A1KW52], that prevents misfolding and promotes the refolding of polypeptides, and the peptidyl-prolyl cis-trans isomerase [A9M3M5], which accelerates the folding of proteins, were down-expressed.	info:pmid/20868485#cont:117	2	1		interaction
GSK3B ---- HSPA8	Binding	Similarly, HSPA8 interacted with GSK3b resulting in little over twofold increase in the reporter activity (Figure 6b(II)).	info:pmid/22266849#cont:363	2	1		interaction
GSK3B ---| TUBA1A	Regulation	(A) Intravitreal injection of GSK-3ß inhibitor induces GFP, ß-catenin, and cell proliferation in the uninjured retina of 1016 tuba1a:gfp transgenic fish.	info:pmid/21911394#cont:179	2	1		interaction	Retina {Organ urn:agi-ncimorgan:C1962966}
ABCC8 ---- HSPA8	Binding	During the biogenesis of KATP channels, it has recently been shown that SUR1 can interact with heat shock cognate 70, heat shock protein 90, and heat shock protein40 (17).	info:pmid/21411514#cont:128	2	1		interaction
HSPD1 --+> CDH5	Expression	Immunostaining demonstrated that Cpn60.1 inhibits VCAM-1 and increases vascular endothelial-cadherin expression in lung vascular tissue, suggesting that the antiinflammatory effect of Cpn60.1 is partly mediated by altering the expression of adhesion molecules.	info:pmid/22447969#abs:8	2	1		interaction	Lung {Organ urn:agi-ncimorgan:C1278908}
HSPD1 ---- LTF	Binding	Bovine lactoferrin binds to a 60 kDa heat shock protein of Helicobacter pylori., It is not known if this is related to the report that the cell surface Cpn60 of H. pylori binds to lactoferrin, which might have effects on cell growth (Amini et al. 1996).	info:pmid/9116643#abs:1, info:pmid/22143554#cont:346	2	2		interaction	Stomach {Organ urn:agi-ncimorgan:C1278920}
LTF ---> GSK3B	Regulation	We demonstrated for the first time that Lactoferrin, irrespective of the iron saturation can increase phosphorylation of Dishevelled 2, Gsk3b, and ...	info:pmid/23270517#cont:197	2	1		interaction	Lymphatic System {Organ urn:agi-ncimorgan:C0024235}
ethanol ---> TUBA1A	Regulation	Moreover, Tuba1a and Gapdh housekeeping genes were modulated by ethanol during differentiation and were replaced by a set of ribosomal genes with stable expression.	info:pmid/23724002#abs:8	2	1		interaction
SLC35B4 --+> UDP-glucose	MolTransport	An increased rate of UDP-glucose release in ymd8Delta was reduced by deletion of the YEA4 UDP- N-acetylglucosamine or the HUT1 UDP-galactose transporters, and overexpression of YEA4 or HUT1 increased the rate of UDP-glucose release.	info:pmid/18693752#abs:9	2	1		interaction
HSPA8 ---| PGK1	Regulation	Relative to normal corneal epithelial proteins, six keratoconus epithelial proteins (lamin-A/C, keratin type I cytoskeletal 14, tubulin beta chain, heat shock cognate 71 kDa protein, keratin type I cytoskeletal 16 and protein S100-A4) exhibited up-regulation and five proteins (transketolase, pyruvate kinase, 14-3-3 sigma isoform, phosphoglycerate kinase 1, and NADPH dehydrogenase (quinone) 1) sho…	info:pmid/21281627#abs:5	2	1		interaction	Cornea {Organ urn:agi-ncimorgan:C1550625}
HSPA8 ---> E2F1	ProtModification	This suggests that E2F1 could be a substrate for Hsc70 recruited by T antigen to an Rb family member.	info:pmid/16734427#abs:10	2	1		interaction
GCK ---- HSPD1	Binding	Co-immunoprecipitation results revealed that heat shock protein 60 (HSP60) could interact with ATP-glucokinase and ADP-glucokinase at 60 and 75°C, whereas at 80°C, the interaction was only effectively with ADP-glucokinase but not ATP-glucokinase.	info:pmid/24058911#abs:6	2	1		interaction
ethanol --+> CDH5	Regulation	Ethanol induced the endocytosis of VE-cadherin and the effect was blocked by jasplakinolide.	info:pmid/22331491#abs:11	2	1		interaction	Blood Vessels {Organ urn:agi-ncimorgan:C0005847}
SP1 --+> E2F1	PromoterBinding	Gel mobility shift assays with multiple oligonucleotides and protein antibodies (for supershifts) showed that the -146 to -54 region of the E2F1 gene promoter bound Sp1 and NF-Y proteins in MCF-7 cells., Using chromatin immunoprecipitation experiments, we showed that COUP-TFII directly regulates the expression of E2F1 through tethering to the Sp1 binding sites in the promoter of E2F1 to modulate …	info:pmid/10446910#abs:3, info:pmid/22734039#abs:5, info:pmid/17909268#abs:4, info:pmid/9218478#body:199, info:pmid/12947120#body:228, info:pmid/12511608#body:147, info:pmid/16916939#body:294, info:pmid/12697671#body:240, info:pmid/10660616#body:322, info:pmid/9819401#body:221 <more data available...>	2	12		Breast Cancer Related to ESR1 Signaling Pathway, ESR1/ERBB-positive Luminal Breast Cancer, Growth Factor Signaling in Hepatocellular Carcinoma, Vascularization in Hepatocellular Carcinoma, interaction	Umbilical vein
PPi; glucose-1-phosphate; UTP; UDP-glucose; UTP-glucose-1-phosphate uridylyltransferase	ChemicalReaction			5	0		Glycogen metabolism, Galactose metabolism, Ascorbate biosyntesis, interaction

## Sheet: reference
Relation	Status	Type	Sentence	TextRef
UGDH ->-> UDP-glucose		ChemicalReaction	UDP-glucose dehydrogenase (UGDH) catalyzes two oxidations of UDP-glucose to yield UDP-glucuronic acid.	info:pmid/16158268#abs:1
UGDH ->-> UDP-glucose		ChemicalReaction	UDP-glucose dehydrogenase (UGDH) catalyzes two oxidations of UDP-glucose to yield UDP-glucuronic acid.	info:pmid/15044486#abs:1
UGDH ->-> UDP-glucose		ChemicalReaction	UDP-glucose dehydrogenase catalyzes the NAD+-dependent twofold oxidation of UDP-glucose to give UDP-glucuronic acid.	info:pmid/14686915#abs:1
UGDH ->-> UDP-glucose		ChemicalReaction	The enzyme UDP-glucose dehydrogenase catalyzes the NAD+-dependent 2-fold oxidation of UDP-glucose and provides a source of the acid.	info:pmid/9013585#abs:2
UGDH ->-> UDP-glucose		ChemicalReaction	UDP-glucose dehydrogenase (UGDH) oxidizes UDP-glucose to UDP-glucuronate, an essential precursor for production of hyaluronan , proteoglycans, and xenobiotic glucuronides.	info:pmid/19244115#abs:1
UGDH ->-> UDP-glucose		ChemicalReaction	UDP-glucose dehydrogenase catalyzes the NAD?-dependent twofold oxidation of UDP-glucose to produce UDP-glucuronic acid , a requisite precursor in the biosynthesis of L-Ara4N and bacterial exopolysaccharides.	info:pmid/21536136#abs:2
UGDH ->-> UDP-glucose		ChemicalReaction	UDP-glucose dehydrogenase (UGDH) catalyzes a two-step NAD(+)-dependent oxidation of UDP-glucose to produce UDP-glucuronic acid, which is a common substrate for the biosynthesis of exopolysaccharide.	info:pmid/17442666#abs:1
UGDH ->-> UDP-glucose		ChemicalReaction	* In plants, UDP-glucuronic acid is synthesized by the oxidation of UDP-glucose by UDP-glucose dehydrogenase or the oxygenation of free myo-inositol by myo-inositol oxygenase (MIOX).	info:pmid/19691674#abs:1
UGDH ->-> UDP-glucose		ChemicalReaction	The oxidation of UDP-glucose by the enzyme UDP-glucose dehydrogenase (EC 1.1.1.22) from beef liver has been shown to proceed via the enzyme-bound intermediate, UDP-alpha-D-glyco-hexodialdose.	info:pmid/557038#abs:1
UGDH ->-> UDP-glucose		ChemicalReaction	UDP-glucose dehydrogenase (UGDH) catalyzes the synthesis of UDP-glucuronic acid from UDP-glucose resulting in the formation of proteoglycans that are involved in promoting normal cellular growth and migration.	info:pmid/17073734#abs:1
UGDH ->-> UDP-glucose		ChemicalReaction	UDP-glucose dehydrogenase (UGDH) catalyzes oxidation of UDP-glucose to yield UDP-glucuronic acid, a precursor of hyaluronic acid and other glycosaminoglycans in extracellular matrix.	info:pmid/20691680#abs:1
UGDH ->-> UDP-glucose		ChemicalReaction	The enzyme UDP-glucose dehydrogenase (Udpgdh) (EC 1.1.1.22) converts UDP-glucose to UDP-glucuronate, a critical component of the glycosaminoglycans, hyaluronan, chondroitin sulfate, and heparan sulfate.	info:pmid/9737970#abs:1
UGDH ->-> UDP-glucose		ChemicalReaction	Uridine diphosphate -glucose dehydrogenase (UGDH) catalyzes the oxidation of Uridine diphosphate-glucose to yield Uridine diphosphate-glucuronic acid, a precursor for synthesis of glycosaminoglycans and proteoglycans that promote aggressive prostate cancer progression.	info:pmid/19676054#abs:1
UGDH ->-> UDP-glucose		ChemicalReaction	Because previous studies of the related enzyme from bovine liver had suggested loss of the C-5 hydrogen from UDP-gluco-hexodialdose due to keto-enol tautomerism, we examined incorporation of solvent deuterium into product(s) of UDP-glucose oxidation by Human UDP-glucose 6-dehydrogenase.	info:pmid/22525098#abs:4
UGDH ->-> UDP-glucose		ChemicalReaction	Loss of C-5 hydrogen during oxidation of UDP-D-glucose by UDP-D-glucose dehydrogenase.	info:pmid/437116#title:1
UGDH ->-> UDP-glucose		ChemicalReaction	UDP-glucose dehydrogenase forms UDP-glucuronate from UDP-glucose.	info:pmid/20576523#body:182
UGDH ->-> UDP-glucose		ChemicalReaction	Transient kinetic analysis of UDP-glucose oxidation by wild-type Human UDP-glucose 6-dehydrogenase.	info:pmid/21502315#cont:286
UGDH ->-> UDP-glucose		ChemicalReaction	UGDH catalyses a 2-fold oxidation of UDP-Glc (UDP-a-D-glucose) using an NAD(P), typically NAD+, as the oxidant.	info:pmid/20863317#cont:10
UGDH ->-> UDP-glucose		ChemicalReaction	In that system, Feingold and co-workers biochemically identified a UDP-glucose dehydrogenase, which forms UDP-glucuronic acid from UDP-glucose .	info:pmid/11115750#body:61
UGDH ->-> UDP-glucose		ChemicalReaction	KfiD is a UDP-glucose dehydrogenase that catalyzes the formation of UDP-GlcUA from UDP-glucose (11), and KfiB is thought to be a binding protein.	info:pmid/19915003#body:65
UGDH ->-> UDP-glucose		ChemicalReaction	Because UGDH catalyzes the production of UDP-glucuronic acid from UDP-glucose, these latter strains are capable of self-sufficient glucuronide production.	info:pmid/21862693#cont:126
UGDH ->-> UDP-glucose		ChemicalReaction	UDP-Glc can be oxidized by UDP-Glc dehydrogenase to generate UDP-GlcA [1,2], which is converted into UDP-GalA by UDP-GlcA 4-epimerase.	info:pmid/16266295#body:40
UGDH ->-> UDP-glucose		ChemicalReaction	UDP-glucose dehydrogenase (UGDH; EC 1.1.1.22) catalyzes an NAD +-dependent two-step oxidation of UDP-glucose to generate UDP-glucuronate .	info:pmid/18930055#body:1
UGDH ->-> UDP-glucose		ChemicalReaction	UGDH catalyzes two NAD+-dependent oxidations of UDP-glucose, the first reversible, to yield UDP-glucuronic acid in an overall irreversible process [29,30].	info:pmid/21984906#cont:55
UGDH ->-> UDP-glucose		ChemicalReaction	UDP-glucose dehydrogenase converts UDP-glucose to UDP-glucutonate, a critical component of the glycosaminoglycans, hyluronan, chondroitin sulfate and heparan sulfate .	info:pmid/17187782#body:151
UGDH ->-> UDP-glucose		ChemicalReaction	In plants, oxidation of UDP-glucose by UDP-glucose dehydrogenase is the major source of UDP-glucuronic acid used to synthesize matrix phase polysaccharides (pectin and hemicellulose) of cell walls .	info:pmid/12413493#body:13
UGDH ->-> UDP-glucose		ChemicalReaction	The addition of glucuronic acid to the polysaccharide chain requires UDP-glucuronic acid synthesis, which occurs via oxidation of UDP-glucose by UDP-glucose dehydrogenase in the cytoplasm.	info:pmid/20673806#body:167
UGDH ->-> UDP-glucose		ChemicalReaction	INTRODUCTION TOP ABSTRACT INTRODUCTION MATERIALS AND METHODS RESULTS AND DISCUSSION REFERENCES UDP-glucose dehydrogenase (UGDH,2 EC 1.1.1.22 [EC] ) catalyzes an NAD+-dependent, 2-fold oxidation of UDP-glucose to generate UDP-glucuronic acid (1).	info:pmid/16418163#body:57
UGDH ->-> UDP-glucose		ChemicalReaction	However, this does not appear to be the case, as two different studies have shown that mutants carrying disruptions of the UGD1 gene, which encodes the UDP-glucose dehydrogenase that converts UDP-glucose to UDP-glucuronic acid, completely lack UDP-glucuronic acid and capsule synthesis (Griffith et al., 2004[Down]; Moyrand & Janbon, 2004[Down]).	info:pmid/19383710#body:298
UGDH ->-> UDP-glucose		ChemicalReaction	Another interesting gene down-regulated by chronic ethanol consumption is the UDP-glucose dehydrogenase, which converts UDP-glucose to UDP-glucuronate (UDP-glucose + 2NAD + + H 2O ? UDP-glucuronate + 2NADH + H +), a critical component of the glycosaminoglycans, hyaluronan, chondroitin sulfate, and heparin sulfate.	info:pmid/17920746#body:100
UGDH ->-> UDP-glucose		ChemicalReaction	UGP and UDP-glucose 6-dehydrogenase catalyse the formation of UDP-D-glucose and UDP-D-glucuronic acid, respectively whereas UDP-D-glucuronate 4-epimerase 1 (Figure 5D1) and UDP-XYL synthase 5 catalyse the formation of UDP-D-galacturonic acid (precursor for pectin) and UDP-D-xylose (precursor for hemicellulose) from UDP-D-glucuronic acid, respectively (Additional file 5 and Additional file 6).	info:pmid/23151214#cont:172
UGDH ->-> UDP-glucose		ChemicalReaction	Differences in their thermodynamic parameters signify that UDP-Glc is more rapidly converted by caprine UDP-glucose dehydrogenase than that by the bovine enzyme.	info:doi/10.1016/j.molcatb.2010.09.007#body:188
SP1 ---> DHFR		PromoterBinding	The dihydrofolate reductase (dhfr) promoter contains cis-acting elements for Sp1 and E2F.	info:pmid/12788094#abs:1
SP1 ---> DHFR		PromoterBinding	We have determined the effect of intermolecular triplex DNA formation on Sp1 binding to the DHFR promoter.	info:pmid/1597451#abs:2
SP1 ---> DHFR		PromoterBinding	The dihydrofolate reductase (DHFR) gene (dhfr) promoter contains cis-acting elements for the transcription factors Sp1 and E2F.	info:pmid/9363748#abs:1
SP1 ---> DHFR		PromoterBinding	We report here that Sp1 binds to these regions in the dhfr promoter, and that Sp1-containing preparations stimulate transcription from the dhfr promoter in an in vitro reaction.	info:pmid/3945313#abs:5
SP1 ---> DHFR		PromoterBinding	The dihydrofolate reductase promoter contains four Sp1 sites and is specifically repressed by Sp3 (36).	info:pmid/10196209#body:307
SP1 ---> DHFR		PromoterBinding	Cyclin A/Cdk2 (cyclin-dependent kinase 2) enhances the transactivation of the dhfr promoter by Sp1 ( ) .	info:pmid/18364237#body:72
SP1 ---> DHFR		PromoterBinding	The SP1 binding region on human dihydrofolate reductase promoter (70bp) was used as a positive control for anti-SP1 ChIP assay ( ).	info:pmid/23137637#body:67
SP1 ---> DHFR		PromoterBinding	Binding of Sp1 to the dihydrofolate reductase promoter has been found to be elevated in serum-stimulated CHO cells .	info:pmid/11336792#body:123
SP1 ---> DHFR		PromoterBinding	Finally, transfection of Sp1 into the Sp1-negative SL2 cells transactivated transcription from the dihydrofolate reductase promoter.	info:pmid/11598016#body:64
SP1 ---> DHFR		PromoterBinding	While in some studies, E2F sites alone are adequate to induce transcription after growth stimulation ( ), in other studies, the binding of Sp1 to the proximal GC box of the dhfr promoter is growth regulated ( ).	info:pmid/18804698#body:135
SP1 ---> DHFR		PromoterBinding	We wish to understand the mechanisms by which site-specific DNA binding proteins activate the murine dhfr promoter, which contains four Sp1 binding sites and an E2F binding site that overlaps the start site of transcription.	info:pmid/10336493#body:45
SP1 ---> DHFR		PromoterBinding	It was previously reported that Sp3 could repress the activity of multiple Sp1 sites contained in the dihydrofolate reductase promoter but not the single Sp1 site contained in the thymidine kinase promoter (19).	info:pmid/11027677#body:188
SP1 ---> DHFR		PromoterBinding	It was previously reported that Sp3 could repress the activity of multiple Sp1 sites contained in the dihydrofolate reductase promoter but not the single Sp1 site contained in the thymidine kinase promoter (21).	info:pmid/11443124#body:218
SP1 ---> DHFR		PromoterBinding	The promoter of the dihydrofolate reductase gene, which has been well characterized in hamster, mouse, and human, also contains Sp1 and E2F response elements in the vicinity of its transcription initiation region (42).	info:pmid/12077144#body:481
SP1 ---> DHFR		PromoterBinding	Briefly, the pGL3-DHFR-WT luciferase (DHFR-WT-luc) reporter contains 230 bp of upstream sequence of the dhfr promoter that includes the transcription start site, the overlapping E2F elements, and the Sp1 binding sites (GC boxes I-IV).	info:pmid/12927774#body:62
SP1 ---> DHFR		PromoterBinding	While in some studies, E2F sites alone are adequate to induce transcription after growth stimulation ( ), in other studies, the binding of Sp1 to the proximal GC box of the dhfr promoter is growth regulated ( ).	info:doi/10.1016/S0083-6729(08)00409-3#body:135
GCK ---> Diabetes Mellitus, Type 2		Regulation	Heterozygous GCK mutations cause maturity-onset diabetes of the young .	info:pmid/21518409#abs:2
GCK ---> Diabetes Mellitus, Type 2		Regulation	Activation of glucokinase represents a promising concept for the treatment of type 2 diabetes.	info:pmid/16980436#abs:2
GCK ---> Diabetes Mellitus, Type 2		Regulation	Mutations in the glucokinase (GCK) gene result in maturity-onset diabetes of the young .	info:pmid/22289546#abs:1
GCK ---> Diabetes Mellitus, Type 2		Regulation	Mutations in the glucokinase gene are a major cause of maturity-onset diabetes of the young.	info:pmid/8349034#abs:1
GCK ---> Diabetes Mellitus, Type 2		Regulation	Mutations in the glucokinase (GCK) gene are the most frequent cause of maturity onset diabetes of the young in Italy.	info:pmid/22335469#abs:1
GCK ---> Diabetes Mellitus, Type 2		Regulation	Mutations in the glucokinase (GCK) gene are considered to be a possible cause of maturity-onset diabetes of the young.	info:pmid/11106831#abs:1
GCK ---> Diabetes Mellitus, Type 2		Regulation	Dysfunction or misregulation of GCK causes hyperinsulinemia, hypertriglyceridemia, and type 2 diabetes.	info:pmid/23957911#abs:2
GCK ---> Diabetes Mellitus, Type 2		Regulation	The only mutation so far discovered is of glucokinase producing maturity-onset diabetes of the young, that has a clearly defined and unusual phenotype.	info:pmid/1485947#abs:7
GCK ---> Diabetes Mellitus, Type 2		Regulation	Mutations in the glucokinase gene have been shown to be the major cause of maturity-onset diabetes of the young in Caucasian subjects.	info:pmid/7983801#abs:2
GCK ---> Diabetes Mellitus, Type 2		Regulation	A less frequent mutation in the glucokinase gene can cause both permanent neonatal diabetes as well as mild diabetes MODY 2.	info:pmid/22525692#abs:4
GCK ---> Diabetes Mellitus, Type 2		Regulation	Glucokinase mutations appear to be the most common cause of Maturity-onset diabetes of the young in the European population, being found in 60% of the families investigated.	info:pmid/7951673#abs:4
GCK ---> Diabetes Mellitus, Type 2		Regulation	These results suggest that the GCK locus, but not the adenosine deaminase locus, contributes to the genetic susceptibility to type 2 diabetes in Japanese.(ABSTRACT TRUNCATED AT 250 WORDS)	info:pmid/7924873#abs:7
GCK ---> Diabetes Mellitus, Type 2		Regulation	The purpose of this study was to evaluate the role of potential glucokinase defects contributing to susceptibility to Type 2 (non-insulin-dependent) diabetes mellitus in Welsh Caucasians.	info:pmid/8314445#abs:1
GCK ---> Diabetes Mellitus, Type 2		Regulation	We conclude that the prevalence of mutations in the promoter of the glucokinase gene responsible for noninsulin-dependent diabetes mellitus is rare among Japanese patients.	info:pmid/8077376#abs:9
GCK ---> Diabetes Mellitus, Type 2		Regulation	These studies indicate that deficiencies in both beta cell and hepatic Glucokinase contribute to the hyperglycemia of MODY-2.	info:pmid/9867845#abs:9
GCK ---> Diabetes Mellitus, Type 2		Regulation	Maturity-onset diabetes of the young caused by heterozygous mutations in the glucokinase (GCK) gene typically presents with lifelong, stable, mild fasting hyperglycaemia.	info:pmid/23586928#abs:1
GCK ---> Diabetes Mellitus, Type 2		Regulation	Mutations in glucokinase are the first cause of maturity onset diabetes of the young among Italian children selected through a low threshold limit of fasting plasma glucose (i. e. > 5.5 mmol).	info:pmid/11508276#abs:10
GCK ---> Diabetes Mellitus, Type 2		Regulation	Mutations in the human glucokinase gene are thought to cause maturity-onset diabetes of youth by leading to the production of enzymes with reduced catalytic activities and increased glucose Km values.	info:pmid/7619052#abs:1
GCK ---> Diabetes Mellitus, Type 2		Regulation	Heterozygous mutations of glucokinase (GCK) and hepatocyte nuclear factor-1 alpha (HNF1A; also known as hepatic transcription factor 1 [TCF1]) genes are the most common cause of MODY.	info:pmid/17828387#abs:1
GCK ---> Diabetes Mellitus, Type 2		Regulation	Glucokinase and phosphorylase both have a high control strength over hepatocyte glycogen metabolism and are potential therapeutic targets for type 2 diabetes.	info:pmid/15734835#abs:1
GCK ---> Diabetes Mellitus, Type 2		Regulation	Mutations in the GCK/maturity-onset diabetes of the young2 gene are the most common cause of maturity-onset diabetes of the young in our population as recruited from pediatric and adolescent index patients.	info:pmid/12050210#abs:14
GCK ---> Diabetes Mellitus, Type 2		Regulation	Mutations of the glucokinase gene (chromosome 7p) have been shown to cause some cases of familial maturity onset diabetes of youth but few, if any, cases of late onset familial Type 2 diabetes.	info:pmid/7705022#abs:1
GCK ---> Diabetes Mellitus, Type 2		Regulation	Mutations in GCK are a cause of maturity-onset diabetes of the young , and GCKR, the regulator of GCK in the liver, is a diabetes susceptibility locus.	info:pmid/22456868#abs:3
GCK ---> Diabetes Mellitus, Type 2		Regulation	Missense and nonsense mutations in the glucokinase gene have recently been shown to result in maturity-onset diabetes of the young , a subtype of non-insulin-dependent diabetes mellitus with early age of onset.	info:pmid/8376578#abs:1
GCK ---> Diabetes Mellitus, Type 2		Regulation	Maturity-onset diabetes of the young is mostly caused by mutations of the hepatocyte nuclear factor -1alpha (Maturity-onset diabetes of the young3) and glucokinase (Maturity-onset diabetes of the young2) genes in Caucasians.	info:pmid/16632067#abs:1
GCK ---> Diabetes Mellitus, Type 2		Regulation	In Caucasians, maturity-onset diabetes of the young is mostly caused by mutations in the hepatocyte nuclear factor -1alpha (maturity-onset diabetes of the young3) and glucokinase (maturity-onset diabetes of the young2) genes.	info:pmid/15657605#abs:1
GCK ---> Diabetes Mellitus, Type 2		Regulation	Mutations in 5 different genes [the hepatocyte nuclear factor -4alpha), glucokinase, HNF-1alpha, insulin promoter factor-1, and HNF-1beta genes] have been shown to cause maturity onset diabetes of the young .	info:pmid/9920109#abs:1
GCK ---> Diabetes Mellitus, Type 2		Regulation	Because we identified only one subject who had a structurally abnormal glucokinase molecule, we conclude that the prevalence of structural mutations in the glucokinase gene responsible for NIDDM appears to be rare among Japanese patients.	info:pmid/8325443#abs:5
GCK ---> Diabetes Mellitus, Type 2		Regulation	Common genetic risk variants at GCK, SLC30A8, IGF2BP2 and MTNR1B influence to different extents the development of impaired fasting glucose and the transition from impaired fasting glucose to type 2 diabetes.	info:pmid/22038522#abs:9
GCK ---> Diabetes Mellitus, Type 2		Regulation	However, the variations in or near the glucokinase gene might play a dominant role in the development of non-insulin dependent diabetes mellitus in some Chinese and represent a subgroup of common non-insulin dependent diabetes mellitus.	info:pmid/11189234#abs:10
GCK ---> Diabetes Mellitus, Type 2		Regulation	Glucokinase (hexokinase IV) continues to be a compelling target for the treatment of type 2 diabetes given the wealth of supporting human genetics data and numerous reports of robust clinical glucose lowering in patients treated with small molecule allosteric activators.	info:pmid/24239482#abs:1
GCK ---> Diabetes Mellitus, Type 2		Regulation	Many genes accounting for monogenic forms of diabetes have been identified--such as maturity onset diabetes of the young ; glucokinase (GCK) and HNF1alpha mutations being the most common causes of maturity onset diabetes of the young.	info:pmid/16035391#abs:7
GCK ---> Diabetes Mellitus, Type 2		Regulation	These include the enzyme glucokinase, which causes Maturity onset diabetes of the young2, and the transcription factors HNF- 4 alpha, TCF1, I PF-1, TCF2, and NeuroD1, which cause Maturity onset diabetes of the young1, 3, 4, 5, and 6, respectively.	info:pmid/17551475#abs:5
GCK ---> Diabetes Mellitus, Type 2		Regulation	Our study indicates that mutations in the GCK/Maturity-onset diabetes of the young2 gene are a very common cause of Maturity-onset diabetes of the young in the Italian population and broadens our knowledge of the naturally occurring GCK mutation repertoire.	info:pmid/12955723#abs:5
GCK ---> Diabetes Mellitus, Type 2		Regulation	Glucokinase , a glucose sensor, maintains plasma glucose homeostasis via phosphorylation of glucose and is a potential therapeutic target for treating maturity-onset diabetes of the young and persistent hyperinsulinemic hypoglycemia of infancy .	info:pmid/19617908#abs:1
GCK ---> Diabetes Mellitus, Type 2		Regulation	We identified 35 carriers of GCK mutations causing MODY2, two carriers of TCF1 mutations causing MODY3, one carrier of a HNF4A mutation causing MODY1 and one carrier of a KCNJ11 mutation causing permanent neonatal diabetes mellitus.	info:pmid/16602010#abs:5
GCK ---> Diabetes Mellitus, Type 2		Regulation	In contrast to the glucokinase and HNF-1alpha genes, mutations in the HNF-4alpha gene are a relatively uncommon cause of Maturity-onset diabetes of the young, and our understanding of the Maturity-onset diabetes of the young1 form of diabetes is based on studies of only a single family, the R-W pedigree.	info:pmid/9294105#abs:3
GCK ---> Diabetes Mellitus, Type 2		Regulation	To assess the possible role of glucokinase defects contributing to a genetic susceptibility to NIDDM in Japanese, allelic frequencies of two microsatellite repeat polymorphisms, one in the 3'-flanking region (GCK1) and the other in the 5'-flanking region (GCK2) of the human glucokinase gene, were analyzed in subjects with NIDDM and in nondiabetic control subjects.	info:pmid/8325445#abs:1
GCK ---> Diabetes Mellitus, Type 2		Regulation	The discovery that glucokinase mutations can cause maturity-onset diabetes of the young and was also found in ten affected members of a pedigree with type 2 diabetes in which maturity-onset diabetes of the young had not previously been considered indicates that diagnosis based on molecular pathology will be helpful in understanding the aetiology of type 2 diabetes.	info:pmid/1303265#abs:4
GCK ---> Diabetes Mellitus, Type 2		Regulation	There are a number of publications that have suggested that diabetes with onset during pregnancy is not a monogeneous disease and apart from "classical" form of Gestational Diabetes Mellitus, which precedes type 2 diabetes development, MODY 2 diabetes, caused by monogenic defect of glucokinase gene, is relatively frequent "subtype" of gestational diabetes.	info:pmid/18159847#abs:2
GCK ---> Diabetes Mellitus, Type 2		Regulation	Both, glucokinase and HNF-4a have been shown to be responsible for MODY.	info:pmid/11950391#body:144
GCK ---> Diabetes Mellitus, Type 2		Regulation	It is widely recognized that specific mutations in GCK are a major cause of MODY2.	info:pmid/23291412#body:127
GCK ---> Diabetes Mellitus, Type 2		Regulation	In the heterozygous form, GCK mutations cause maturity-onset diabetes of the young .	info:pmid/15644838#body:6
GCK ---> Diabetes Mellitus, Type 2		Regulation	GCK and HNF1A mutations are the most frequent cause of MODY in all populations studied [3].	info:pmid/20499044#cont:25
GCK ---> Diabetes Mellitus, Type 2		Regulation	Glucokinase therefore represents an attractive potential therapeutic target for Type 2 diabetes mellitus.	info:pmid/22943931#cont:30
GCK ---> Diabetes Mellitus, Type 2		Regulation	A mutation in glucokinase can lead to maturity-onset diabetes mellitus in youth .	info:pmid/20598720#body:82
GCK ---> Diabetes Mellitus, Type 2		Regulation	This was the first identification of GCK mutations producing MODY when heterozygous and PNDM when homozygous.	info:pmid/18436707#body:586
GCK ---> Diabetes Mellitus, Type 2		Regulation	Nonsense mutation in the glucokinase gene causes early-onset non-insulin-dependent diabetes mellitus.	info:pmid/1570017#title:1
GCK ---> Diabetes Mellitus, Type 2		Regulation	MODY-2 is caused by mutations in the GCK [glucokinase (hexokinase 4)] gene.	info:pmid/21617108#cont:1075
GCK ---> Diabetes Mellitus, Type 2		Regulation	MODY-2 is caused by mutations in the GCK [glucokinase (hexokinase 4)] gene.	info:pmid/21617152#cont:1104
GCK ---> Diabetes Mellitus, Type 2		Regulation	Identification of two new mutations in the glucokinase gene that result in maturity-onset diabetes of the young.	info:pmid/20587714#title:1
GCK ---> Diabetes Mellitus, Type 2		Regulation	Therefore, alterations in the regulation of glucokinase may play an important role in the development of type 2 diabetes.	info:pmid/17707340#body:12
GCK ---> Diabetes Mellitus, Type 2		Regulation	Mutations in GCK, HNF1A and HNF4A are the most common causes of MODY although the mutation prevalence may vary across populations.	info:pmid/22498247#body:85
GCK ---> Diabetes Mellitus, Type 2		Regulation	H. et al. (1992) Nonsense mutation in the glucokinase gene causes early-onset non-insulin-dependent diabetes mellitus.	info:pmid/16173921#body:323
GCK ---> Diabetes Mellitus, Type 2		Regulation	Identification and functional characterisation of novel glucokinase mutations causing maturity-onset diabetes of the young in Slovakia.	info:pmid/22493702#title:1
GCK ---> Diabetes Mellitus, Type 2		Regulation	It is widely recognized that mutations in glucokinase are a major cause of maturity-onset diabetes of the young.	info:pmid/11246883#body:51
GCK ---> Diabetes Mellitus, Type 2		Regulation	Insights into the structure and regulation of glucokinase from a novel mutation (V62M), which causes maturity-onset diabetes of the young.	info:pmid/22974438#cont:775
GCK ---> Diabetes Mellitus, Type 2		Regulation	Insights into the structure and regulation of glucokinase from a novel mutation (V62M), which causes maturity-onset diabetes of the young.	info:pmid/15677479#title:1
GCK ---> Diabetes Mellitus, Type 2		Regulation	(1992) Nonsense mutation in the glucokinase gene causes early-onset non-insulin-dependent diabetes mellitus.	info:pmid/22393382#cont:341
GCK ---> Diabetes Mellitus, Type 2		Regulation	Rare mutations in the human glucokinase (GCK) gene have been reported to be a cause of maturity-onset diabetes of the young.10	info:pmid/20574426#cont:37
GCK ---> Diabetes Mellitus, Type 2		Regulation	In fact, the inactivating mutation of glucokinase is one of the causes of maturity-onset diabetes of the young ( ).	info:pmid/18295293#body:142
GCK ---> Diabetes Mellitus, Type 2		Regulation	For example, Maturity onset diabetes in the young2, which is caused by a mutation in glucokinase, has a benign natural course characterized by mild ...	info:pmid/12050204#body:163
GCK ---> Diabetes Mellitus, Type 2		Regulation	Thermal instability, structural changes and self-association of glucokinase mutations causing maturity-onset diabetes of the young have been shown [40–45].	info:pmid/24028089#cont:253
GCK ---> Diabetes Mellitus, Type 2		Regulation	... glucokinase gene allele that impair enzyme function cause type 2 maturity onset diabetes of young (MODY2) (9), whereas inactivating mutations in both ...	info:pmid/15919746#body:70
GCK ---> Diabetes Mellitus, Type 2		Regulation	It is important to distinguish between transcription factor maturity-onset diabetes of the young and maturity-onset diabetes of the young caused by GCK mutations.	info:pmid/12359128#body:62
GCK ---> Diabetes Mellitus, Type 2		Regulation	... , but not all, reports from Southern and Central Europe where mutations in GCK are by far the most prevalent cause of Maturity-onset diabetes of the young ...	info:pmid/15928245#body:233
GCK ---> Diabetes Mellitus, Type 2		Regulation	Nominal associations with maturity-onset diabetes of the Young gene glucokinase isoform 1 was also observed with type 2 diabetes age at diagnosis (Table 2).	info:pmid/20144192#body:210
GCK ---> Diabetes Mellitus, Type 2		Regulation	In France, GCK mutations are the most common cause of Maturity onset diabetes of the young, with 56% of analyzed patients carrying mutations in this gene.	info:pmid/19410318#body:14
GCK ---> Diabetes Mellitus, Type 2		Regulation	... glucokinase locus and NONINSULIN-DEPENDENT diabetes mellitus in American blacks and in Mauritian Creoles, suggesting that the glucokinase gene might play a ...	info:pmid/9177383#body:121
GCK ---> Diabetes Mellitus, Type 2		Regulation	The most common types are MODY 3 and MODY 2 which are caused by mutations in the HNF1A (hepatocyte nuclear factor 1-a) gene and GCK (glucokinase) gene, respectively.	info:pmid/20132997#body:4
GCK ---> Diabetes Mellitus, Type 2		Regulation	Mutations in the GCK gene cause maturity-onset diabetes of the young, a dominantly inherited young-onset subtype of diabetes (2-4).	info:pmid/15677518#body:57
GCK ---> Diabetes Mellitus, Type 2		Regulation	Rare mutations in GCK play a role for the development of maturity-onset diabetes of the young , a disorder characterized by mild stable fasting hyperglycemia (10).	info:pmid/19741166#body:42
GCK ---> Diabetes Mellitus, Type 2		Regulation	Hepatic glucokinase has a major e 1ect on glucose homeostasis and is a potential target for the pharmacological treatment of type 2 diabetes.	info:pmid/23047945#cont:342
GCK ---> Diabetes Mellitus, Type 2		Regulation	As an exception, the glucokinase gene , which is known to be responsible for maturity-onset diabetes of the young, type 2 (MODY2, OMIM 125851) , was found to be deleted in all patients.	info:pmid/16829355#body:50
GCK ---> Diabetes Mellitus, Type 2		Regulation	Abnormal regulation of hepatic glucose output in maturity-onset diabetes of the young caused by a specific mutation of the glucokinase gene.	info:pmid/9000695#title:1
GCK ---> Diabetes Mellitus, Type 2		Regulation	Update on mutations in glucokinase (GCK), which cause maturity-onset diabetes of the young, permanent neonatal diabetes, and hyperinsulinemic hypoglycemia.	info:pmid/23139355#cont:299
GCK ---> Diabetes Mellitus, Type 2		Regulation	Update on mutations in glucokinase (GCK), which cause maturity-onset diabetes of the young, permanent neonatal diabetes, and hyperinsulinemic hypoglycemia.	info:pmid/21994424#cont:368
GCK ---> Diabetes Mellitus, Type 2		Regulation	Update on mutations in glucokinase (GCK), which cause maturity-onset diabetes of the young, permanent neonatal diabetes, and hyperinsulinemic hypoglycemia.	info:pmid/22611063#cont:101
GCK ---> Diabetes Mellitus, Type 2		Regulation	Update on mutations in glucokinase (GCK), which cause maturity-onset diabetes of the young, permanent neonatal diabetes, and hyperinsulinemic hypoglycemia.	info:pmid/19790256#title:1
GCK ---> Diabetes Mellitus, Type 2		Regulation	Glucokinase , a glucose-phosphorylating enzyme, represents an attractive target for Type 2 diabetes therapies, because it plays a critical role in whole-body glucose control through its actions in multiple organs.	info:pmid/19726182#body:5
GCK ---> Diabetes Mellitus, Type 2		Regulation	GCK heterozygous mutations that reduce enzyme activity lead to maturity-onset diabetes of the young type 2 diabetes, whereas homozygous mutations causing a complete loss of enzyme activity result	info:pmid/22653590#cont:35
GCK ---> Diabetes Mellitus, Type 2		Regulation	The regulation of hepatic Glucokinase is central for glucose homeostasis, and Glucokinase activation is a promising approach to decrease hyperglycemia in type 2 diabetes.	info:pmid/18809676#body:290
GCK ---> Diabetes Mellitus, Type 2		Regulation	The structural characterization and comparison of the known, MODY-causing, GCK mutations including the two novel GCK mutations presented here are important for the better understanding the functional role of distinct GCK components.	info:pmid/23890519#body:138
GCK ---> Diabetes Mellitus, Type 2		Regulation	Glucokinase plays a key role in maintaining glucose homeostasis and might be an important therapeutic target for treating metabolic diseases, such as MODY2 and persistent hyperinsulinemic hypoglycemia of infancy.	info:pmid/23409066#cont:245
GCK ---> Diabetes Mellitus, Type 2		Regulation	Heterozygous inactivating mutations in GCK cause maturity-onset diabetes of the young , in which mild hyperglycemia is present at birth but often only detected later in life during screening for other purposes (2,3).	info:pmid/12941786#body:53
GCK ---> Diabetes Mellitus, Type 2		Regulation	Mutations in the glucokinase gene of the fetus have been shown to lead to reduced intrauterine growth and to the development of a monogenic form of diabetes, maturity onset diabetes of the young.	info:pmid/16257499#body:44
GCK ---> Diabetes Mellitus, Type 2		Regulation	The peroxynitrite-mediated GCK down-regulation or inactivation may induce the perturbation of glucose metabolism and cellular antioxidant defense mechanisms, increasing susceptibility to insulin resistance and type 2 diabetes.	info:pmid/20855893#cont:362
GCK ---> Diabetes Mellitus, Type 2		Regulation	Loss of both Glucokinase alleles results in permanent neonatal diabetes, whereas heterozygous inactivating mutations of Glucokinase lead to maturity-onset diabetes of the young (MODY2; Hattersley et al. 1992).	info:pmid/21571864#cont:12
GCK ---> Diabetes Mellitus, Type 2		Regulation	These results indicate that structural instability of a catalytically normal Glucokinase might be a cause of diabetes in MODY-2 families with E70K, E300K, and by extrapolation may play a role in other Glucokinase mutations.	info:pmid/9078243#body:34
GCK ---> Diabetes Mellitus, Type 2		Regulation	Inactivating GCK mutations lead to maturity-onset diabetes of the young and neonatal diabetes [5–7], whereas activating GCK mutations cause persistent hyperinsulinaemic hypoglycaemia [8–11].	info:pmid/23441155#cont:32
GCK ---> Diabetes Mellitus, Type 2		Regulation	Also, common variations in GCK have been suggested to be involved in common forms of type 2 diabetes, and a particular focus has been given to a -30G>A polymorphism (rs1799884) in the pancreatic ß-cell-specific promoter of GCK.	info:pmid/16186409#body:50
GCK ---> Diabetes Mellitus, Type 2		Regulation	The most frequent genetic defects are maturity onset diabetes of the young 3 caused by mutations in the hepatocyte nuclear factor-1a (HNF1A) gene and maturity onset diabetes of the young 2 due to mutations in the glucokinase (GCK) gene.	info:pmid/24065178#cont:19
GCK ---> Diabetes Mellitus, Type 2		Regulation	D: glucokinase mRNA expression was determined by real-time PCR in liver samples from rats exposed to 30 min of portal vein insulin delivered in either typical pulsatile fashion, same-rate constant infusion, or reduced pulses (type 2 diabetes mellitus).	info:pmid/22688333#cont:239
GCK ---> Diabetes Mellitus, Type 2		Regulation	The fasting plasma glucose level and obesity index are useful tools to identify GCK mutations in these subjects who are clinically diagnosed with type 2 diabetes, and cases of diabetes that are caused by GCK mutations may not be rare in Japanese subjects as previously described.	info:pmid/21720051#cont:298
GCK ---> Diabetes Mellitus, Type 2		Regulation	Glucokinase activation via small-molecule Glucokinase activators in combination with increased cAMP production via glucagon-like peptide 1 derivatives may be a powerful strategy for the treatment of the decreased insulin secretion and decreased ß cell mass in type 2 diabetes.	info:pmid/17200721#body:239
GCK ---> Diabetes Mellitus, Type 2		Regulation	Candidate genes under the logarithm of odds-1 intervals for the three chromosome 7 peaks in Table 2 include previously identified type 2 diabetes genes glucokinase 1 (23), interleukin 6 (24), and growth factor receptor-bound protein 10 (25,26) and IGF binding proteins IGF2BP3, IGFBP1, and IGFBP3.	info:pmid/18835935#body:188
GCK ---> Diabetes Mellitus, Type 2		Regulation	Thus, heterozygous inactivating mutations in glucokinase are one cause of maturity-onset diabetes of the young, which is characterized by mild fasting hyperglycemia, whereas homozygous inactivating glucokinase mutations result in permanent neonatal diabetes mellitus, which is characterized by severe hyperglycemia (39).	info:pmid/23274894#cont:325
GCK ---> Diabetes Mellitus, Type 2		Regulation	Maturity-onset diabetes of the young2 and Maturity-onset diabetes of the young3, caused, respectively, by mutations in glucokinase (GCK) and hepatocyte nuclear factor-1alpha (HNF1A), are the most common causes of Maturity-onset diabetes of the young in all Caucasian European populations studied, explaining the majority cases of clinical Maturity-onset diabetes of the young (more than 50%) .	info:pmid/18672310#body:2
GCK ---> Diabetes Mellitus, Type 2		Regulation	Because chemical activators of glucokinase are under development as a new promising class of antidiabetic drugs (24), the knowledge of the glucokinase-PFK-2/FBPase-2 interaction may help to find the rationale for the physiological upregulation of glucokinase and new perspective therapeutic strategies to activate or preserve the glucose sensor function of glucokinase in type 2 diabetes.	info:pmid/15047617#body:343
GCK ---> Diabetes Mellitus, Type 2		Regulation	Glucokinase plays an important role as a glucose sensor for controlling plasma glucose homeostasis by enhancing insulin secretion from pancreatic ß-cells and glucose metabolism in the liver (1, 2), which provides rational expectations that enhancement of Glucokinase activity would be a novel therapeutic strategy for type 2 diabetes.	info:pmid/17028192#body:59
GSK3B ---> Diabetes Mellitus, Type 2		Regulation	Glycogen Synthase Kinase 3beta is one of the important targets in the treatment of type II diabetes and Alzheimer's disease.	info:pmid/18929433#abs:1
GSK3B ---> Diabetes Mellitus, Type 2		Regulation	Glycogen synthase kinase 3beta (GSK3beta) is a well-known marker and potential therapeutic target in non-insulin-dependent diabetes mellitus and Alzheimer's disease.	info:pmid/17652946#abs:1
GSK3B ---> Diabetes Mellitus, Type 2		Regulation	GSK-3 remains an important target for interventions designed to improve insulin action in obesity-associated insulin resistance and type 2 diabetes.	info:pmid/20594161#abs:9
GSK3B ---> Diabetes Mellitus, Type 2		Regulation	Glycogen synthase kinase-3ß (GSK-3ß) plays a key role in type II diabetes and Alzheimer's diseases, to which non-ATP competitive inhibitors represent an effectively therapeutical approach due to their good specificity.	info:pmid/23047001#abs:1
GSK3B ---> Diabetes Mellitus, Type 2		Regulation	Desflurane-induced post-conditioning in human myocardium from patients with type 2 diabetes was mediated by the activation of protein kinase C, the opening of the mitoK(ATP) channels, and the phosphorylation of Akt and GSK-3ß.	info:pmid/21862498#abs:12
GSK3B ---> Diabetes Mellitus, Type 2		Regulation	A recent study revealed that GSK3ß positively regulates S6K1 , and thus use of drugs targeting GSK3ß to treat type 2 diabetes was suggested.	info:pmid/23583197#body:11
GSK3B ---> Diabetes Mellitus, Type 2		Regulation	Thus, a gain of function on GSK-3beta in different tissues produces different pathologies, such the above recapitulated Alzheimer’s disease or diabetes type II.	info:pmid/23931441#cont:72
GSK3B ---> Diabetes Mellitus, Type 2		Regulation	GSK-3ß has been hypothesized to have roles in several disease conditions, including type II diabetes, bipolar disorder, and neurodegenerative disease.	info:pmid/14690613#body:157
GSK3B ---> Diabetes Mellitus, Type 2		Regulation	GSK-3 activation leads to insulin resistance and the development of type 2 diabetes, making GSK-3 an interesting drug target for treatment of this disease.	info:pmid/19135095#body:50
GSK3B ---> Diabetes Mellitus, Type 2		Regulation	Therefore, GSK3b, one of isoforms of GSK3, is an important enzyme in regulating glucose metabolism and acts as a key target in treatment of type 2 diabetes mellitus.	info:pmid/21886796#cont:53
GSK3B ---> Diabetes Mellitus, Type 2		Regulation	GSK-3ß plays a role in (neuro)degenerative disorders, e.g. Alzheimer’s disease, diabetes mellitus type 2, and various carcinomas (Peineau et al. 2008; Kanninen et al. 2011).	info:pmid/22271002#cont:428
GSK3B ---> Diabetes Mellitus, Type 2		Regulation	Apart from a role in neurological pathologies, GSK-3 may also play a role in the development of non-insulin-dependent diabetes mellitus , a disease often associated with chronic inhibition of muscle glycogen synthase (reviewed in Kaidanovich and Eldar-Finkelman, 2002).	info:pmid/12615961#body:238
GSK3B ---> Diabetes Mellitus, Type 2		Regulation	The inhibition of GSK-3ß activity by low-molecular natural or artificial substances is believed to be variously beneficial, for example, in the treatment of neurodegenerative diseases, diabetes type II, bipolar disorders, stroke, cancer, and chronic inflammatory disease (for review ).	info:pmid/15527765#body:88
GSK3B ---> Diabetes Mellitus, Type 2		Regulation	If GSK-3 inhibits cancer progression, GSK-3 inhibitors should not be used to treat diseases such as type 2 diabetes despite findings that these inhibitors clearly show that GSK3 can be a good therapeutic target for the treatment of insulin resistance and type 2 diabetes without any significant side effects in mice (26).	info:pmid/22065737#cont:695
GSK3B ---> Diabetes Mellitus, Type 2		Regulation	Glycogen synthase kinase 3ß (GSK-3ß) is a potential therapeutic target for cancer, type-2 diabetes, and Alzheimer's disease.	info:pmid/21615159#abs:1
GSK3B ---> Diabetes Mellitus, Type 2		Regulation	The GSK-3beta inhibitory activity of phenylmethylene hydantoins entitles them to be potential leads for the treatment of cancer, Alzheimer's disease, bipolar disorders, stroke, different tau pathologies, and type-2 diabetes.	info:pmid/19616957#abs:8
GSK3B ---> Diabetes Mellitus, Type 2		Regulation	GSK-3ß is involved in the molecular pathogenesis of human diseases such as type-2 diabetes, Alzheimer's disease and cancer .	info:doi/10.1016/j.fitote.2012.03.024#body:95
SP1 ---> SLC2A1		PromoterBinding	We conclude that the consensus Sp1 site located in the rat proximal Glut1 promoter is necessary and sufficient for basal expression of the Glut1 gene, as well as for its response to hyperosmolarity.	info:pmid/16162661#abs:7
SP1 ---> SLC2A1		PromoterBinding	Electrophoretic mobility shift assays demonstrate that the transcription factor Sp1, a trans-activator of GLUT-1 promoter, binds to the -102/-82 region of GLUT-1 promoter during the fetal state but not during adulthood.	info:pmid/10364200#abs:5
SP1 ---> SLC2A1		PromoterBinding	Electrophoretic mobility shift assays showed the binding of Sp1 protein to the fragment -102/-37 in the myoblast state but not in myotubes, and Sp1 was found to transactivate the GLUT1 promoter.	info:pmid/9148896#abs:4
SP1 ---> SLC2A1		PromoterBinding	Sp1 strongly transactivates the GLUT1 promoter.	info:pmid/18226599#body:86
SP1 ---> SLC2A1		PromoterBinding	Previous evidence indicates that Sp1 transactivates the GLUT1 gene promoter .	info:pmid/11090961#body:82
SP1 ---> SLC2A1		PromoterBinding	These results indicate that endogenous Sp1 present in extracts from L6E9 myoblasts binds to the GLUT1 promoter.	info:pmid/9148898#body:258
SP1 ---> SLC2A1		PromoterBinding	... Sp1 was involved in the regulation of GLUT1 gene expression during this differentiation and that the Sp1 binding site located between -76 and -53 bp in the ...	info:pmid/17872376#body:60
SP1 ---> SLC2A1		PromoterBinding	Furthermore, muscle denervation enhances Sp1 and Sp3 binding activity (51), which indicates that denervation-mediated enhancement in GLUT1 gene transcription may be also explained by activation of the Sp1 site of the proximal GLUT1 promoter.	info:pmid/11278386#body:338
SP1 ---> SLC2A1		PromoterBinding	Our results show that cancellation of both Sp1 and Sp3 binding to the -91/-86 GC box of the GLUT1 gene promoter causes no alteration in the transcriptional activity driven by the construct -99/ + 134 fused to the CAT reporter gene.	info:doi/10.1006/jmbi.1999.3216#body:137
UDP-glucose <-<- UTP-glucose-1-phosphate uridylyltransferase		ChemicalReaction	UGPase reversibly catalyses the formation of UDP-glucose and is critical in carbohydrate metabolism.	info:pmid/22132858#abs:2
UDP-glucose <-<- UTP-glucose-1-phosphate uridylyltransferase		ChemicalReaction	UDP-glucose pyrophosphorylase catalyzes the synthesis of UDP-glucose, an essential metabolite in all living organisms.	info:pmid/15272173#abs:1
UDP-glucose <-<- UTP-glucose-1-phosphate uridylyltransferase		ChemicalReaction	The formation of UDP-glucose is catalyzed by UDP-glucose pyrophosphorylase , which is highly conserved among eukaryotes.	info:pmid/17010990#abs:3
UDP-glucose <-<- UTP-glucose-1-phosphate uridylyltransferase		ChemicalReaction	UDP-Glc pyrophosphorylase (EC 2.7.7.9) catalyses the interconversion of MgUTP plus Glc1P and UDP-Glc plus MgPPi.	info:pmid/8631325#abs:1
UDP-glucose <-<- UTP-glucose-1-phosphate uridylyltransferase		ChemicalReaction	UDP-glucose pyrophosphorylase is involved in the production of UDP-glucose, a key precursor to polysaccharide synthesis in all organisms.	info:pmid/16289256#abs:1
UDP-glucose <-<- UTP-glucose-1-phosphate uridylyltransferase		ChemicalReaction	Glucose-1-phosphate uridylyltransferase from E. coli K12 was used to convert uridine-5'-triphosphate and glucose-1-phosphate to UDP-D-glucose.	info:pmid/15469740#abs:1
UDP-glucose <-<- UTP-glucose-1-phosphate uridylyltransferase		ChemicalReaction	The activity of UDP-glucose pyrophosphorylase (UDPG:PP), the enzyme that catalyzes the formation of UDP-glucose, was in the mutant 4% and in the revertant 56% of the activity found in the wild type cell.	info:pmid/9295324#abs:3
UDP-glucose <-<- UTP-glucose-1-phosphate uridylyltransferase		ChemicalReaction	The S. elodea ATCC 31461 UgpG protein, encoded by the ugpG gene which maps outside the gel cluster, was previously identified as the UDP-glucose pyrophosphorylase involved in the formation of UDP-glucose, also required for gellan synthesis.	info:pmid/16085866#abs:7
UDP-glucose <-<- UTP-glucose-1-phosphate uridylyltransferase		ChemicalReaction	The enzymatic activity of UDP-glucose pyrophosphorylase in TL01, which catalyzes UDP-glucose formation, was found to be much lower than the activities of other enzymes involved in the biosynthesis of UDP-glucose and the glucosyltransferase ValG.	info:pmid/22008983#abs:5
UDP-glucose <-<- UTP-glucose-1-phosphate uridylyltransferase		ChemicalReaction	From the deduced amino acid sequence, UDP-glucose pyrophosphorylase3 was presumed to be a UDP-glucose pyrophosphorylase involved in the generation of UDP-glucose, serving as the precursor of the polar head of sulfolipid.	info:pmid/19286968#abs:5
UDP-glucose <-<- UTP-glucose-1-phosphate uridylyltransferase		ChemicalReaction	The subsequent formation of UDP-glucose is catalyzed by the enzyme UDP-glucose pyrophosphorylase (GalU).	info:pmid/16996629#body:7
UDP-glucose <-<- UTP-glucose-1-phosphate uridylyltransferase		ChemicalReaction	Leishmania major uridine diphosphate-glucose pyrophosphorylase (LmajUGPase) is involved in the de novo synthesis of UDP-glucose.	info:pmid/24463105#body:139
UDP-glucose <-<- UTP-glucose-1-phosphate uridylyltransferase		ChemicalReaction	In addition, PA2022 is closely linked to the galU gene that encodes UDP-glucose pyrophosphorylase, an enzyme that synthesizes UDP-glucose.	info:pmid/17442666#body:313
UDP-glucose <-<- UTP-glucose-1-phosphate uridylyltransferase		ChemicalReaction	HasC is a UDP-glucose pyrophosphorylase, which is required to convert glucose 1-phosphate and UTP to UDP-glucose (27).	info:pmid/9206724#body:64
UDP-glucose <-<- UTP-glucose-1-phosphate uridylyltransferase		ChemicalReaction	In the synthesis direction, UDP-glucose pyrophosphorylase catalyzes the formation of UDP-Glc and PPi from UTP and Glc-1-P.	info:pmid/17996328#body:2
UDP-glucose <-<- UTP-glucose-1-phosphate uridylyltransferase		ChemicalReaction	However, the specific activity of UDP-glucose pyrophosphorylase, which catalyses the synthesis of UDP-glucose remained relatively constant during the 20 h ...	info:pmid/22309612#cont:153
UDP-glucose <-<- UTP-glucose-1-phosphate uridylyltransferase		ChemicalReaction	UDP-glucose pyrophosphorylase (Ugp1p) catalyzes the generation of UDP-glucose and pyrophosphate from glucose-1-P and UTP ( ).	info:pmid/12372297#body:102
UDP-glucose <-<- UTP-glucose-1-phosphate uridylyltransferase		ChemicalReaction	UGP3 is a plastid UDP-glucose pyrophosphorylase that converts glucose-1-phosphate to UDP-glucose in the stroma .	info:pmid/21371504#body:71
UDP-glucose <-<- UTP-glucose-1-phosphate uridylyltransferase		ChemicalReaction	Uridine diphosphate-glucose pyrophosphorylase catalyzes the formation of UDP-glucose, a precursor of membrane glycolipids and cell envelope teichoic acids ( ).	info:pmid/20655455#body:97
UDP-glucose <-<- UTP-glucose-1-phosphate uridylyltransferase		ChemicalReaction	In the presence of [14C]glucose-1-P, the UDP-glucose pyrophosphorylase-catalyzed formation of [14C]UDP-glucose was assayed as a function of UTP concentration.	info:pmid/9305892#body:94
UDP-glucose <-<- UTP-glucose-1-phosphate uridylyltransferase		ChemicalReaction	L. major UDP-glucose pyrophosphorylase Complements the E. coli Mutant DEV6 galU-UDP-glucose pyrophosphorylases catalyze the synthesis of UDP-Glc and PPi from glucose-1-phosphate and UTP.	info:pmid/16611637#body:184
UDP-glucose <-<- UTP-glucose-1-phosphate uridylyltransferase		ChemicalReaction	The enzyme UTP:glucose-1-phosphate uridylyltransferase (UDP-glucose pyrophosphorylase, UDPG:PP) (EC 2.7.7.9) catalyzes the formation of UDP-glucose, which is the substrate for the synthesis of UDP-GlcA.	info:pmid/9841918#body:40
UDP-glucose <-<- UTP-glucose-1-phosphate uridylyltransferase		ChemicalReaction	The first one is UTP-glucose-1-phosphate uridylyltransferase (UDP-glucose pyrophosphorylase, UDPGP), which catalyzes the reaction of converting glucose 1-phosphate to UDP-glucose, the immediate donor of glucose for glycogen synthesis.	info:pmid/23990911#cont:847
UDP-glucose <-<- UTP-glucose-1-phosphate uridylyltransferase		ChemicalReaction	When it happens, Aeromonas establish a preference for survival, abolish the production of surface glucan polysaccharide and produces a rather complete lipopolysaccharide-core by the incorporation of UDP-glucose molecules synthesized via GlgC (UDP-glucose pyrophosphorylase).	info:pmid/22563467#cont:228
UDP-glucose <-<- UTP-glucose-1-phosphate uridylyltransferase		ChemicalReaction	The enzyme UTP-glucose-1-phosphate uridylyltransferase (UDP-glucose pyrophosphorylase, UDPG:PP) (EC 2.7.7.9) catalyzes the formation of UDP-glucose from Glc-1-phosphate and UTP and is required for the interconversion of Glc and galactose by way of the Leloir pathway ( ).	info:pmid/11137293#body:1
UDP-glucose <-<- UTP-glucose-1-phosphate uridylyltransferase		ChemicalReaction	The conversion of glucose-6-phosphate to glucose-1-phosphate by phosphoglucomutase and the subsequent formation of UDP-glucose, which is catalysed by UDP-glucose pyrophosphorylase, have been proposed as potential controlling points in the production of Exopolysaccharide .	info:pmid/12788547#body:65
UDP-glucose <-<- UTP-glucose-1-phosphate uridylyltransferase		ChemicalReaction	GalU (EF1746; uridine diphosphoglucose pyrophosphorylase) converts glucose-1 phosphate to UDP-glucose, an essential substrate for lipoteichoic acids glycolipid anchor synthesis and a precursor for the synthesis of sugar polymers such as exocellular (lipo)polysaccharides [55].	info:pmid/22194979#cont:257
UDP-glucose <-<- UTP-glucose-1-phosphate uridylyltransferase		ChemicalReaction	The interconversions between fructose 6-phosphate, glucose 6-phosphate, G1P, and UDP-glucose are catalyzed by phosphoglucoi-somerase (EC 5.3.1.9), phosphoglucomutase (EC 5.4.2.2) and UDP-glucose pyrophosphorylase (EC 2.7.7.9) in readily reversible reactions.	info:pmid/22412983#cont:25
UDP-glucose <-<- UTP-glucose-1-phosphate uridylyltransferase		ChemicalReaction	The phylogenetic tree presented in Fig. 2B demonstrates that LmjUSP is clearly distinct from the UDP-glucose-synthesizing enzyme UDP-glucose pyrophosphorylase as well as the UDP-N-acetylglucosamine pyrophosphorylase and UDP-glucose:a-d-galactose-1-phosphate uridylyltransferase (GALT).	info:pmid/19906649#body:131
UDP-glucose <-<- UTP-glucose-1-phosphate uridylyltransferase		ChemicalReaction	The initial reaction carried out by the glucokinase, that is, the phosphorylation of glucose to glucose 6-phosphate, is also the starting point for glycogen synthesis, which is then continued by the glucose phosphate mutase reaction and thereafter by UDP-glucose pyrophosphorylase, which forms UDP-glucose as a starter molecule.	info:pmid/15063686#body:27
UDP-glucose <-<- UTP-glucose-1-phosphate uridylyltransferase		ChemicalReaction	Uridine diphosphate (UDP 1 Abbreviations used: UDP, uridine diphosphate; UTP, uridine triphosphate; GDP, guanosine diphosphate. )-glucose pyrophosphorylase (or glucose 1-phosphate uridylyltransferase) (UGP, EC 2.7.7.9) catalyzes the reversible formation of UDP-glucose and inorganic pyrophosphate from UTP and glucose 1-phosphate (Glc-l-P).	info:pmid/18621545#body:9
UDP-glucose <-<- UTP-glucose-1-phosphate uridylyltransferase		ChemicalReaction	UDP-glucose synthesized by UGPase has a number of vital cellular functions, including the synthesis of glycogen, the synthesis of the carbohydrate moiety of glycolipids, glycoproteins, and proteoglycans, the entry of galactose into glycolysis and the synthesis of UDP-glucuronic acid .	info:doi/10.1016/j.molcatb.2007.09.018#body:4
HSPD1 ---| Diabetes, Autoimmune		Regulation	Immunity to hsp65 can cause autoimmune diabetes in mice and may be related to autoimmune arthritis in rats and humans, so immunity to hsp65 should be forbidden; yet healthy persons manifest T-cell responses to self-hsp65.	info:pmid/1680347#abs:3
HSPD1 ---| Diabetes, Autoimmune		Regulation	Therefore, it has been suggested that the anti-hsp60 T cells involved in the autoimmune diabetes of NOD mice might reflect molecular mimicry between Mycobacterial-hsp60 and a beta-cell tissue specific molecule sharing similar T cell epitopes, the p277 peptide of hsp60 in particular.	info:pmid/8738959#abs:3
HSPD1 ---| Diabetes, Autoimmune		Regulation	The hsp60 peptide p277 arrests the autoimmune diabetes induced by the toxin streptozotocin.	info:pmid/8772717#title:1
HSPD1 ---| Diabetes, Autoimmune		Regulation	Studies to evaluate the effects of immunization with modified insulin peptide are in progress. (See the article by Eisenbarth and Jasinski elsewhere in this issue for further discussion of this topic.) Immunization of mice with a peptide of heat shock protein 60 was shown to prevent autoimmune diabetes in two murine models of human disease .	info:pmid/15053897#body:156
HSPD1 ---| Diabetes, Autoimmune		Regulation	In fact, it has been shown that a peptide of Hsp60 can act as an immunomodulatory factor and suppress the development of autoimmune diabetes by inducing T-helper 2--type cytokines.	info:doi/10.1016/S0039-6060(98)70130-8#body:117
HSPA8 ---> ER unfolded protein response		Regulation	Conversely, HSP72/73 was found to be down-regulated, resulting probably from the endoplasmic reticulum unfolded protein response as previously reported [Skandrani, D., Gaubin, Y., Vincent, C., Beau, B., Murat, J.C., Soleilhavoup, J.P., Croute, F., 2006. Relationship between toxicity of selected insecticides and expression of stress protein (HSP, GRP) in cultured human cells: effects of commercial…	info:pmid/16884889#abs:12
HSPA8 ---> ER unfolded protein response		Regulation	It is possible that HSC70(1) functions as GRP78 and regulates unfolded protein response in S. frugiperda cells.	info:pmid/21982219#body:61
ABCC8 ---> Diabetes Mellitus, Type 2		Regulation	ABCC8 mutations can cause MODY in patients whose clinical features are similar to those with HNF1A/4A MODY.	info:pmid/21989597#abs:10
ABCC8 ---> Diabetes Mellitus, Type 2		Regulation	The high-affinity sulfonylurea receptor (SUR1) gene regulates insulin secretion and may play a role in type 2 diabetes.	info:pmid/9799081#abs:1
ABCC8 ---> Diabetes Mellitus, Type 2		Regulation	We conclude that in Caucasians, the SUR locus may contribute to the genetic susceptibility to NIDDM and obesity.	info:pmid/9075812#abs:10
ABCC8 ---> Diabetes Mellitus, Type 2		Regulation	ABCC8 exons 16 and 31 variants increase susceptibility to type 2 diabetes mellitus and KCNJ11 E23K decreases insulin secretion in a Turkish population.	info:pmid/22704848#abs:10
ABCC8 ---> Diabetes Mellitus, Type 2		Regulation	The KCNJ11 E23K and ABCC8 exon 31 variants contribute to susceptibility to type 2 diabetes diabetes, glucose intolerance and altered insulin secretion in a Russian population.	info:pmid/18758683#abs:7
ABCC8 ---> Diabetes Mellitus, Type 2		Regulation	Clinical and metabolic features of adult-onset diabetes caused by ABCC8 mutations.	info:pmid/22210575#title:1
ABCC8 ---> Diabetes Mellitus, Type 2		Regulation	Sur1 is the target of sulfonylurea drugs used for decades to treat diabetes mellitus type 2.	info:pmid/23255597#cont:33
ABCC8 ---> Diabetes Mellitus, Type 2		Regulation	The sulfonylurea receptor ( ABCC8, SUR1) may contribute to Non-insulin-dependent diabetes mellitus.	info:pmid/12437993#body:122
ABCC8 ---> Diabetes Mellitus, Type 2		Regulation	Sur1 is the target of sulfonylurea drugs used to treat diabetes mellitus type 2, neonatal diabetes, and some forms of congenital hyperinsulinism.	info:pmid/22714048#cont:44
ABCC8 ---> Diabetes Mellitus, Type 2		Regulation	All drugs that block KATP channels stimulate insulin secretion, but only those that interact with the SUR subunit are used therapeutically to treat type 2 diabetes.	info:pmid/12475777#body:51
ABCC8 ---> Diabetes Mellitus, Type 2		Regulation	Our results show that the E1506K mutation in the K ATP channel subunit (SUR1) had a dominant pattern of inheritance in a large pedigree, leading to development of insulin deficiency and type 2 diabetes.	info:pmid/12559865#body:74
ABCC8 ---> Diabetes Mellitus, Type 2		Regulation	All drugs that block pancreatic ß-cell K ATP channels stimulate insulin secretion, but only those that interact with the SUR subunit are used therapeutically to treat type 2 diabetes mellitus.	info:pmid/16647758#body:445
ABCC8 ---> Diabetes Mellitus, Type 2		Regulation	Hani et al. (322) and Inoue et al. (323) have suggested that the SUR1 locus may contribute to the genetic susceptibility of Caucasians to Non-Insulin-Dependent Diabetes Mellitus, while Iwasaki et al. (324) and Stirling et al. (325) have concluded that this locus does not make a major contribution to this susceptibility in Japanese and Mexican-American populations, respectively.	info:pmid/10204114#body:1175
ABCC8 ---> Diabetes Mellitus, Type 2		Regulation	Accordingly, SUR1 is a drug target in the treatment of persistent hyperinsulinemic hypoglycemia of infancy, type II diabetes, as well as other conditions involving SUR2 such as hypertension (for review, see Ref. 20).	info:pmid/11994306#body:54
HSPD1 ---> Diabetes Mellitus, Type 2		Regulation	This study was the first epidemiological study to demonstrate an association between type 2 diabetes mellitus and HSP60, thus suggesting that HSP60 may play an important role in the type 2 diabetes mellitus pathology.	info:pmid/19576649#abs:9
HSPD1 ---> Diabetes Mellitus, Type 2		Regulation	HSP60 may also play a role in the regulation of mitochondrial function in type 2 diabetes and obesity.	info:pmid/24084737#cont:27
HSPD1 ---> Diabetes Mellitus, Type 2		Regulation	Our study is the first demonstrating that Hsp60 might also be a relevant mediator for skeletal muscle and adipose tissue insulin resistance, thereby contributing to the development of type 2 diabetes.	info:pmid/22315307#cont:256
SP1 --+> LTF		PromoterBinding	The presence of a C/EBP site flanked by 2 Sp1 sites within this segment of the lactoferrin promoter prompted us to investigate the possible role of these sites in lactoferrin expression.	info:pmid/10845904#abs:3
SP1 --+> LTF		PromoterBinding	The lactoferrin promoter is activated by C/EBPs and Sp1 and is repressed by CDP (Khanna-Gupta et al., 1997, 2000).	info:pmid/12032776#body:105
SP1 --+> LTF		PromoterBinding	... proposed for T3 suppression of Sp1-dependent transcription of the epidermal growth factor receptor promoter (29), for the regulation of the lactoferrin ...	info:pmid/14715929#body:221
SP1 --+> LTF		PromoterBinding	It was found that Sp1 and C/EBP are necessary to activate the lactoferrin gene promoter during myeloid differentiation .	info:pmid/12565886#body:6
SP1 --+> LTF		PromoterBinding	Two previous studies have suggested that a noncanonical TATA box in the mouse lactoferrin promoter ( ) and a SP1 binding site in porcine lactoferrin promoter ( ) may play a role in the regulation of lactoferrin gene expression.	info:pmid/15935571#body:106
SP1 --+> LTF		PromoterBinding	It may be relevant to note that for the lactoferrin gene promoter, which contains a C/EBP site flanked by two Sp1 sites, there is a functional interaction between C/EBPa and Sp1 in mediating lactoferrin gene expression during myeloid differentiation (28).	info:pmid/11337508#body:328
SP1 --+> LTF		PromoterBinding	Thus, the lack of inhibition for the progesterone receptor and lactoferrin genes in the estrogen receptors?3 uteri in estrus may be related to their regulation at Sp1 and AP-1 sites, with and without half-estrogen response elements sites, which have been identified in the promoters of the progesterone receptor and lactoferrin genes .	info:pmid/22989549#body:191
SLC2A1 ---> Diabetes Mellitus, Type 2		Regulation	We conclude that the GLUT1 gene is unlikely to play a role in the aetiology of non-insulin-dependent diabetes mellitus and obesity.	info:pmid/9600248#abs:8
SLC2A1 ---> Diabetes Mellitus, Type 2		Regulation	Our results suggest that the T8356C and GLUT1 gene mutations may have an important role in developing late-onset type 2 diabetes in Coimbatore population.	info:pmid/20730618#abs:11
SLC2A1 ---> Diabetes Mellitus, Type 2		Regulation	The present study does not support the hypothesis that genetic variation within the GLUT1 or GLUT4 gene loci may be responsible for familial susceptibility to Type 2 diabetes.	info:pmid/1348023#abs:7
SLC2A1 ---> Diabetes Mellitus, Type 2		Regulation	This joint analysis suggests that GLUT1 polymorphism may contribute to susceptibility to type 2 diabetes in some populations, and especially in overweight/obese women.	info:pmid/8904924#abs:5
SLC2A1 ---> Diabetes Mellitus, Type 2		Regulation	In conclusion, it appears from these results that the glucose transporter gene GLUT1 is unlikely to play a major role in the etiology of Maturity-onset diabetes of the young diabetes.	info:pmid/11485019#abs:10
SLC2A1 ---> Diabetes Mellitus, Type 2		Regulation	We conclude that the GLUT1 gene is very unlikely to play a major role in the aetiology of non-insulin-dependent diabetes mellitus, although an accessory role cannot be excluded, and studies of the gene sequence should help to clarify this question.	info:pmid/7516306#abs:9
SLC2A1 ---> Diabetes Mellitus, Type 2		Regulation	For example, genetic variations of several membrane transporters, including SLC2A1/2 and SLC47A1/2 genes, are implicated in the highly variable glycemic response to metformin, a first-line drug used to treat newly diagnosed Type 2 diabetes mellitus.	info:pmid/23894862#abs:5
SLC2A1 ---> Diabetes Mellitus, Type 2		Regulation	Members of the glucose transporter (GLUT) family of membrane-spanning hexose transporters are subjects of intensive investigation for their potential as modifiable targets to treat or prevent obesity, metabolic syndrome, and type 2 diabetes mellitus.	info:pmid/24030250#abs:1
SLC2A1 ---> Diabetes Mellitus, Type 2		Regulation	This study provides further evidence that GLUT1 polymorphism might contribute to susceptibility to type 2 diabetes ( ).	info:pmid/22795339#body:69
SLC2A1 ---> Diabetes Mellitus, Type 2		Regulation	GLUT1 is a glucose transporter which is translocated after insulin stimulation of adipocytes , raising the question of the relative contribution of the GLUT1 transporter to the action of insulin on glucose uptake, an action that is necessary for the development of type 2 diabetes .	info:pmid/9789717#body:5
E2F1 ---> TUBA1A		PromoterBinding	Consistent with the lack of E2F site occupancy of the repressed TUBA3 promoter, we were unable to detect significant E2F6 (or E2F1) binding to the TUBA3 promoter in wild-type fibroblasts by chromatin immunoprecipitation ( B).	info:pmid/15936277#body:67
E2F1 --+> SP1		PromoterBinding	We demonstrate that at least two overlapping E2F1/Sp1 binding sites are present in the p14ARF promoter, and E2F1 activates the promoter through displacing constitutive Sp1 from the overlapping sites.	info:pmid/19115249#abs:4
E2F1 --+> SP1		PromoterBinding	Our results suggest that E2F1 regulates SRC-3 expression through interacting with Sp1 and SRC-3.	info:pmid/16916939#body:272
E2F1 --+> SP1		PromoterBinding	However, we were unable to show that E2F1 binds the SP1 promoter or that E2F1, 2, 3, or 5 were able to modulate SP1 promoter activity.	info:pmid/21248772#cont:331
E2F1 --+> SP1		PromoterBinding	Moreover, ATF5 cooperated with E2F1 to trans-activate Cyclin D3 promoter and overexpression of ATF5 had no effect on E2F1 expression, indicating that ATF5 might regulate Cyclin D3 promote via interaction with E2F1, which has been reported to regulate gene transcription via interaction with Sp1, GABP?, and DP1 .	info:pmid/16300731#body:84
E2F1 --+> SP1		PromoterBinding	In addition to the Rb suppressor and E2F activators (i.e., E2F1, E2F2 and E2F3) that bind directly to the BIRC5 promoter and regulate BIRC5 transcription , the regulatory proteins CDK4, SKP2, Rad51, BRCA2, E2F-DP1, CCND1, Stat3, Rb and p21 can activate the SP1 promoter , which then indirectly leads to an increase in BIRC5 expression.	info:pmid/23433354#cont:215
SP1 ---> E2F1		PromoterBinding	Gel mobility shift assays with multiple oligonucleotides and protein antibodies (for supershifts) showed that the -146 to -54 region of the E2F1 gene promoter bound Sp1 and NF-Y proteins in MCF-7 cells.	info:pmid/10446910#abs:3
SP1 ---> E2F1		PromoterBinding	Using chromatin immunoprecipitation experiments, we showed that COUP-TFII directly regulates the expression of E2F1 through tethering to the Sp1 binding sites in the promoter of E2F1 to modulate cell proliferation.	info:pmid/22734039#abs:5
SP1 ---> E2F1		PromoterBinding	Sp1 and Sp3 bind the GC box in the E2F1 promoter.	info:pmid/9218478#body:199
SP1 ---> E2F1		PromoterBinding	Multiple SP1 sites, CCAAT motifs, and E2F1 binding sites have been identified in human E2F1 promoter (33, 34).	info:pmid/12947120#body:228
SP1 ---> E2F1		PromoterBinding	... E2F-1 Promoter The E2F-1 promoter contains binding sites for the specificity protein 1 (Sp1), metal regulatory element-binding factor (MBF-1), and ...	info:pmid/12511608#body:147
SP1 ---> E2F1		PromoterBinding	This is supported by the additive, rather than cooperative, binding of Sp1 to the different GC-sites in the bcl-2, E2F1 or progesterone receptor promoter .	info:pmid/18206366#body:170
SP1 ---> E2F1		PromoterBinding	Gel mobility shift assays exhibit similar patterns of Sp1 and NFYA binding to the proximal region of the E2F-1 gene promoter in MCF-7 and ZR-75 cells (Figs. ...	info:pmid/12697671#body:240
SP1 ---> E2F1		PromoterBinding	E2F1, 4, 7, and Sp1 bound the E2F1 promoter in proliferating KCs, whereas only the suppressive E2F4 was bound to the E2F1 promoter in growth-arrested/differentiated KCs (Figure 4a).	info:pmid/21248772#cont:131
SP1 ---> E2F1		PromoterBinding	The E2F1 promoter consists of multiple DNA elements, including binding sites for E2F, SP1, and CBF transcription factors, that regulate repression of the promoter in G0 and activation in S phase.	info:pmid/10660616#body:322
SP1 ---> E2F1		PromoterBinding	Binding of Sp1, Sp3, and Sp4 to the CAD, E2F1, and RARa promoters was similar in solvent and E2-treated cells, and this is consistent with the role of all three proteins in mediating basal expression and hormonal activation of estrogen receptora/Sp-dependent CAD, E2F1, and RARa mRNAs (Figs 3C, 4C, and 5C).	info:pmid/17909268#body:269
SP1 ---> UGDH		PromoterBinding	Six Sp1 sites located in the proximal 550 bp of the UGDH gene promoter appear to determine basal promoter activity, as does a previously unrecognized 49-bp sequence spanning -1436 nucleotides and -1388 nucleotides that negatively affects activity.	info:pmid/21576248#abs:5
SP1 ---> UGDH		PromoterBinding	The UGDH core promoter contains twelve Sp1 consensus sequences.	info:pmid/12682078#body:335
SP1 ---> UGDH		PromoterBinding	Also, hypoxia reduces the binding of Sp1 to the UDP-glucose dehydrogenase promoter .	info:pmid/17307335#body:19
SP1 ---> TUBA1A		PromoterBinding	However, we could readily detect binding of the transactivating factors E2F1 and Sp1 to the TUBA3 gene promoter in E2F6 -/- mouse embryonic fibroblasts ( B), which is again in close agreement with the in vivo footprinting pattern and the activity of the TUBA3 promoter in these cells.	info:pmid/15936277#body:68
HSPD1 ---> metabolic stress		Regulation	GroES/EL (Hsp60 family) and DnaK/DnaJ (Hsp70 family) are involved in the heat-shock response to metabolic stress and aid in protein folding and maintaining export-competency .	info:pmid/10617931#body:32
SP1 ---> HSPA8		PromoterBinding	The hsc73 promoter contains putative binding sites for transcription factor Sp1, two CCAAT boxes and, surprisingly, two matches to the consensus heat-shock regulatory element.	info:pmid/3595567#abs:5
SP1 ---> HSPA8		PromoterBinding	In summary, our results indicate that a consensus Sp1-binding site is crucial for ethanol responsiveness of the hsc70 promoter.	info:pmid/10604945#body:320
SP1 ---> HSPA8		PromoterBinding	A cis-acting region and Sp1 consensus binding site in the HSC70 promoter region are required for the ethanol response ( ).	info:pmid/22960394#body:148
GSK3B ---> metabolic stress		Regulation	Compared with control, transfection with constitutively active GSK3ß (GSK3ß-S9A) increased total GSK3ß content before, during, and after metabolic stress (Figure 2B), without marked differences in p-serine9 GSK3ß content between the two groups (Figure 2A) as detected with a phospho-serine9-specific GSK3ß antibody.	info:pmid/20093356#body:61
GSK3B ---> metabolic stress		Regulation	Additionally, since mitochondrial biogenesis is a well-known adaptive response to metabolic stress in order to cope with low energy supply, and specific roles of mitochondrial pool of GSK3 in the regulation of energy metabolism have been suggested ( ), we hypothesize that GSK3 may play a role in mitochondrial biogenesis under metabolic stress condition.	info:pmid/24316184#body:21
ACADS ---- HSPD1		Binding	In vitro studies have shown that interaction of Hsp60 with SCAD is crucial for correct folding of the latter.	info:pmid/18571143#body:204
ACADS ---- HSPD1		Binding	The levels of tetramer and hsp60-complexed SCAD were normalized with respect to the total amount of soluble radiolabeled SCAD protein in the entire lane of the native gel (36, 37).	info:pmid/14506246#body:191
HSPA8 ---- SLC2A1		Binding	However, the newly synthesized GLUT1 may bind to Hsc70 that is known to exist in reticulocyte lysates.	info:pmid/15708368#body:199
DHFR ---- HSPD1		Binding	In vitro, Hsp60 bound to DHFR in the course of thermal denaturation, preventing its aggregation, and mediated its adenosine triphosphate-dependent refolding at increased temperatures.	info:pmid/1359644#abs:5
DHFR ---- HSPD1		Binding	Hydrolysis of ATP is also not required for DHFR release since certain nonhydrolyzable analogues are capable of partial discharge. "Native" DHFR can also form a stable complex with chaperonin 60.	info:pmid/1680394#abs:5
DHFR ---- HSPD1		Binding	Instead, we found that newly imported dihydrofolate reductase associated with Hsp60 in a highly protease-sensitive, unfolded state.	info:pmid/21989011#cont:55
DHFR ---- HSPD1		Binding	The interesting finding was that unfolded DHFR can form a stable complex with the 30 kDa protein in the same way as those with HSP60 [14] and GroEL [19].	info:pmid/9291133#body:200
DHFR ---- HSPD1		Binding	It was proposed by Martin et al., for example, that dihydrofolate reductase and rhodanese are bound to cpn60 as “molten globule” intermediates (14).	info:pmid/9030576#body:60
DHFR ---- HSPD1		Binding	It has been shown that DHFR from E. coli interacts only transiently with the chaperonin GroEL whereas the structurally homologous mouse DHFR forms a stable interaction with it .	info:pmid/10716630#body:6
GSK3B ---> CDH5		Regulation	VE-cadherin participate in forming the complex and can be modulated by GSK-3ß [49].	info:pmid/21557011#cont:188
GSK3B ---> CDH5		Regulation	hepatocyte growth factor-mediated inhibition of GSK-3ß in ECs also improves ß-catenin and VE-cadherin linkage to the cytoskeleton ( ).	info:pmid/20849862#body:162
GSK3B ---> CDH5		Regulation	Furthermore, insulin-like growth factor-1-induced VE-cadherin down-regulation and membrane permeability are reversed by stable expression of a constitutively active GSK-3ß in which Ser9 is replaced by an alanine.	info:pmid/21549192#body:133
SP1 --+> ABCC8		PromoterBinding	We conclude that sequential activation of two transcription factors, HIF and Sp1, is required to stimulate transcription of Abcc8 following cerebral ischemia.	info:pmid/22086197#abs:7
SP1 --+> ABCC8		PromoterBinding	The transcription factor, specificity protein 1, which regulates expression of SUR1 and caspase-3, was activated in the hippocampus 15 minutes after injury.	info:pmid/21107131#abs:4
SP1 --+> ABCC8		PromoterBinding	Sequence analysis of the SUR1 promoter revealed multiple putative SP1 sites (Fig. 1).	info:pmid/10373428#body:212
SP1 --+> ABCC8		PromoterBinding	Luciferase reporter activity driven by the Abcc8 promoter is increased by hypoxia and by coexpression of Hif1a but surprisingly, a series of luciferase reporter assays studying the Abcc8 promoter revealed that binding sites for Sp1, but not for Hif, were required for stimulation of Abcc8 transcription by Hif1a.	info:pmid/22714048#cont:206
ABCC8 ---> SP1		Regulation	Several transcription factors, including Sp1, FoxA2/ HNF3b, Beta2/NeuroD, and STAT3, have been implicated in transcription of Abcc8 in pancreatic b cells (Ashfield and Ashcroft, 1998; Hernandez-Sanchez et al, 1999; Kim et al, 2002; Gorogawa et al, 2004; Lantz et al, 2004).	info:pmid/22714048#cont:203
ABCC8 ---> SP1		Regulation	Several transcription factors, including Sp1, FoxA2/HNF3b, b2/ NeuroD, and STAT3, were implicated in transcription of Abcc8 in pancreatic b cells (Ashfield and Ashcroft, 1998; Hernandez-Sanchez et al, 1999; Kim et al, 2002; Gorogawa et al, 2004; Lantz et al, 2004).	info:pmid/22086197#cont:259
ABCC8 ---> SP1		Regulation	Interestingly, Sp1 has recently been reported to be a target for hypoxia-inducible factor-1, and sequential activation of hypoxia-inducible factor-1 and Sp1 has been implicated in hypoxic induction of the sulfonylurea receptor 1 following cerebral ischemia .	info:doi/10.1016/j.neulet.2012.01.080#body:71
GSK3B ---> E2F1		ProtModification	We previously reported that GSK3beta is able to phosphorylate E2F1 in vitro at Ser403 and Ser433.	info:pmid/20447425#abs:2
GSK3B ---> E2F1		ProtModification	The phosphorylation of E2F1 by GSK3ß suggested that the two proteins physically interact.	info:pmid/17050006#body:115
GSK3B ---> E2F1		ProtModification	Interestingly, E2F1 was recently proved to be phosphorylated by GSK3ß (33).	info:pmid/18367454#body:336
GSK3B ---> E2F1		ProtModification	E2F1 is directly phosphorylated by several cellular protein kinases, including glycogen synthase kinase-3ß, ATM (ataxia telangiectasia mutated), and mitogen activated protein kinases ( ).	info:pmid/21624405#body:111
GSK3B ---| E2F1		Expression	This affirmation is based on evidence that inhibition of GSK3ß blocks pRb phosphorylation and E2F-1 expression.	info:pmid/17612578#body:184
GSK3B ---| E2F1		Expression	These data reveal a second pathway where GSK3ß directly regulates E2 factor activity by physical interaction with the transactivation domain of E2F1.	info:pmid/17050006#body:209
GSK3B ---| E2F1		Expression	If GSK3ß overexpession were to reduce E2F1 level in HEK293 cells, then the cell proliferation rate should be reduced.	info:pmid/18367454#body:223
HSPA8 --+> ENO1		Regulation	It was further shown that Hsc70-overexpression alleviated the H(2)O(2)-induced decrease of a-enolase activity and cell damage, and Hsc70 deficiency aggravated the decrease of a-enolase activity and cell damage in H(2)O(2) treated H9c2 cells.	info:pmid/21958194#abs:6
HSPA8 --+> ENO1		Regulation	At PIM1, ENO1, CCNB1, and UBA52, which are activated by Myc and HSP90AA1 and HSPA8, which are activated by HSF, depletion of Dcp2, or Xrn2+TTF2, increased polymerase II density within the gene body relative to the TSS ( A-6D and ).	info:pmid/22483619#body:99
HSPA8 --+> ENO1		Regulation	At PIM1, ENO1, CCNB1, and UBA52, which are activated by Myc and HSP90AA1 and HSPA8, which are activated by HSF, depletion of Dcp2, or Xrn2+TTF2, increased polymerase II density within the gene body relative to the TSS ( A-6D and ).	info:doi/10.1016/j.molcel.2012.03.006#body:99
GSK3B ---| SLC2A1		Expression	Conversely, expression of a constitutively active form of GSK-3beta resulted in at least a twofold decrease in GLUT1 expression and glucose uptake.	info:pmid/18650261#abs:5
GSK3B ---| SLC2A1		Expression	It has been demonstrated that the inhibition of GSK-3ß can up-regulate glucose transporter (GLUT) expression in several cell lines ( ).	info:pmid/23541490#body:187
GSK3B ---| SLC2A1		Expression	In addition, IFNa2b activated p-GSK-3ß and p-mTOR inhibited the expression of Glut-1 in both a dose-dependent and time-dependent manner (Fig. 3c, d).	info:pmid/22627699#cont:118
GSK3B ---| SLC2A1		Expression	Finally, hypoxia-induced increase in VEGF secretion and in Glut-1 expression was also enhanced by GSK3 inhibition in the presence of lithium.	info:pmid/12764143#body:303
GSK3B ---| SLC2A1		Expression	GSK3-ß overexpression reduces Glut-1 transporter expression and glucose uptake via mTOR-pathway in vitro ( ). described a transgenic mouse overexpressing constitutively active GSK3-ß.	info:pmid/19591936#body:161
GSK3B ---| SLC2A1		Expression	First, chronic inhibition of basal GSK-3 activity in several cell types, including vascular smooth muscle cells, resulted in increase in glucose uptake due to a similar increase in protein expression of glucose transporter1while expression of a constitutively active form of GSK-3ß resulted in decrease in GLUT1 expression and glucose uptake; Second, GSK-3 inhibits mTOR signaling via phosphorylatio…	info:pmid/22750268#body:92
GSK3B ---| SLC2A1		Expression	Similarly, it was reported that the inhibition of the phosphatidylinositol 3-kinase/Akt/GSK-3ß signaling pathway reduces abnormal processing of ß-amyloid production and tau hyperphosphorylation (129, 134, 145), modulates inflammation (129, 135), increases brain insulin-like growth factor I levels (146), ameliorates neuronal damage in conditions of oxidative stress and excitotoxic-ity (136-138), e…	info:pmid/22013558#cont:779
SLC2A1 ---> GSK3B		Regulation	Phosphorylation of Akt and GSK-3 was enhanced by glucose metabolism or overexpression of the glucose transporter, GLUT1, and was prevented by glycolytic inhibition.	info:pmid/12200436#abs:5
SLC2A1 ---> GSK3B		Regulation	Indeed, the phosphorylated form of GSK3ß was significantly increased in GLUT1 overexpressing cells under fully supplemented conditions (Fig. 8A) as well as after 6 h of serum withdrawal (Fig. 8B).	info:pmid/11334423#body:245
SLC2A1 ---> GSK3B		Regulation	Akt may regulate GLUT1 expression through its ability to inhibit GSK3 (glycogen synthase kinase 3), as constitutively activating GSK3 decreases surface levels of GLUT1 [6].	info:pmid/17645414#body:167
SLC2A1 ---> GSK3B		Regulation	Interestingly, overexpression of hexokinase together with GLUT1 has been reported to increase the phosphorylation and inhibition of GSK3 through an increase in glycolysis , suggesting the possibility that hexokinase can facilitate its own interaction with voltage-dependent anion channels.	info:pmid/19130886#body:92
GSK3B ---| GCK		Expression	Figure 6 Acute inhibition of GSK3 is not sufficient to induce FASN and GCK mRNA expression.	info:pmid/16834571#body:540
GCK ---| GSK3B		Regulation	To address the role of GSK3 in an in vitro experimental system, GSK3a and GSK3ß were blocked pharmacologically by LiCl, and GCK flux was assessed.	info:pmid/23823480#body:55
GSK3B --+> GCK		MolTransport	The inability of the GSK3 inhibitor LiCl to block the insulin effect on GCK flux, combined with the in vivo data using the GSK3aS21A/S21A;ßS9A/S9A mice, provide compelling evidence that the enhanced conversion of glucose to glycogen is not mediated by phosphorylation of GSK3a and GSK3ß.	info:pmid/23823480#body:89
GSK3B ---> SP1		Regulation	Overexpression of Snail1 and inhibition of glycogen synthase kinase-3ß in colorectal tumor cells markedly induced the activity of Sp1 transcription factor, which plays a key role in the upregulation of NKG2D ligand expression during Epithelial-mesenchymal transition.	info:pmid/23509364#abs:4
GSK3B ---> SP1		Regulation	GSK3ß-mediates phosphorylation of Sp1 on Ser728 and Ser732, leading to Sp1 protein stabilization in prostate cancer cells ( ).	info:pmid/22835698#body:48
E2F1 ---> DHFR		PromoterBinding	In some cases, we also observed that E2F1 was bound to the p180 and dihydrofolate reductase promoters along with E2F3.	info:pmid/15014447#body:174
E2F1 ---> DHFR		PromoterBinding	The DHFR-Gal4 reporter plasmid contains a Gal4-binding site in precise replacement of the E2F1-binding site in the DHFR promoter.	info:pmid/11713253#body:192
E2F1 ---> DHFR		PromoterBinding	We have also shown that E2F1 can bind to the dhfr promoter in vivo 2 and that E2F1 is a robust activator ofdhfr transcription (29, 62).	info:pmid/10336493#body:244
E2F1 ---> DHFR		PromoterBinding	Evidently, Pura, by interacting with E2F-1 prevents its association with the E2F-1 elements located within the dihydrofolate reductase gene promoter.	info:pmid/10597240#body:136
E2F1 ---> DHFR		PromoterBinding	panel i, E2F1 binding to the dihydrofolate reductase promoter oligonucleotide probe; panel ii, Stat1 and Stat3 binding to the high affinity sis-inducible element probe.	info:pmid/16046414#body:125
E2F1 ---> DHFR		PromoterBinding	E2F1 antibody was added in lane 8 to show the binding specificity. (B) BTG3 knockdown promotes binding of E2F1 to the endogenous ARF, dihydrofolate reductase and Cdc6 promoters.	info:pmid/17690688#body:271
E2F1 ---> DHFR		PromoterBinding	Our chromatin immunoprecipitation analysis indicates that E2F1 binds to the BIM, cyclin E1 (CCNE1), SIVA, TRAF3, and dihydrofolate reductase promoters, but not to the ß-actin control (Fig. 9A).	info:pmid/23833190#cont:377
E2F1 ---> DHFR		PromoterBinding	Similarly, small molecules such as the DNA intercalator mitoxantrone and the minor groove binding distamycin , both of which can inhibit the binding of E2F1 to the dihydrofolate reductase promoter, are strong inhibitors of dihydrofolate reductase gene expression (11).	info:pmid/10818092#body:40
SP1 --+> GCK		PromoterBinding	Transient transfection experiments performed in HepG2 cells and electrophoretic mobility shift assays denoted that Sp1 binds and transactivates GCK promoter, whereas Sp3 repressed Sp1-mediated activation of GCK by competing for the same binding site.	info:pmid/17446237#abs:6
SP1 --+> GCK		PromoterBinding	Sp1 has previously been demonstrated to enhance GCK transcription in gilthead sea bream (Sparus aurata) (20).	info:pmid/19411616#body:200
SP1 ---> FKBP1A		Expression	The results indicated that the mutated promoters have no promoter activity ( ), indicating that the binding sequences for Sp1 and Ets-1 are essential for the promoters of FKBP12.6 and FKBP12, respectively.	info:pmid/16122887#body:96
ethanol ---> GSK3B		Regulation	The phosphatidylinositol 3-kinase/Akt signaling pathway is responsible for inactivation of GSK-3beta by ethanol.	info:pmid/19033378#abs:11
ethanol ---> GSK3B		Regulation	Available evidence indicates that the activity of GSK3beta in the central nervous system is affected by ethanol.	info:pmid/19507062#abs:11
ethanol ---> GSK3B		Regulation	Cyanidin-3-glucoside blocked ethanol-mediated GSK3ß activation by inducing phosphorylation at serine 9 while reducing the phosphorylation at tyrosine 216.	info:pmid/21671257#abs:10
ethanol ---> GSK3B		Regulation	More importantly, Cyanidin-3-glucoside reversed ethanol-mediated activation of GSK3beta and inhibition of neurite outgrowth as well as the expression of neurofilament proteins.	info:pmid/19384566#abs:8
ethanol ---> GSK3B		Regulation	Since ethanol inhibits PI3 Kinase-Akt and increases GSK-3beta activity in brain, we examined the effects of ethanol and GSK-3beta on AAH expression and directional motility in neuronal cells.	info:pmid/18478238#abs:3
ethanol ---> GSK3B		Regulation	Because ethanol increases the activities of both GSK-3beta and Caspases, the inhibitory effect of ethanol on neuronal migration could be mediated by increased GSK-3beta phosphorylation and Caspase degradation of AAH protein.	info:pmid/19393862#abs:12
ethanol ---> GSK3B		Regulation	Acute ethanol challenge inhibits glycogen synthase kinase-3beta in the rat prefrontal cortex.	info:pmid/19007447#title:1
ethanol ---> GSK3B		Regulation	Ethanol decreases the phosphorylation of Akt (Ser-473 and Thr-308) and GSK-3ß (Ser-9) in B82L and B82M721, leading to GSK-3ß activation.	info:pmid/15878157#body:119
ethanol ---> GSK3B		Regulation	Genotype differences in the regulation of Akt, Gsk3ß and ERK1/2 by acute ethanol in certain brain areas of AA and ANA were described later .	info:pmid/21843598#body:6
ethanol ---> GSK3B		Regulation	Moreover, during neuronal differentiation, ethanol inhibits neurite outgrowth by activating GSK-3B through dephosphorylation at serine 9 (42).	info:pmid/21878650#cont:337
ethanol ---> GSK3B		Regulation	... of glycogen synthase kinase 3beta , a multifunctional serine/threonine kinase that responds to various cellular stresses, was affected by ethanol (6) ...	info:pmid/20919934#cont:304
ethanol ---> GSK3B		Regulation	Ethanol increases TRB3 by an as yet unknown mechanism, which binds the pleckstrin homology domain of cytosolic Akt, thereby blocking Akt phosphorylation, resulting in the maintenance of GSK3 activation.	info:pmid/16452480#body:303
ethanol ---> GSK3B		Regulation	Chronic gestational exposure to ethanol resulted in significantly reduced levels of pAkt, pGSK-3beta, pBAD, and Akt kinase activity and increased levels of total BAD protein and GSK-3beta kinase activity (p < 0.05 or p < 0.001; see Fig. 9).	info:pmid/12700235#body:255
ethanol ---> GSK3B		Regulation	Lithium-induced increases in phosphorylation levels of GSK-3ß and reduction in phospho-tau recognized by anti-PHF-1 antibody indicated that lithium inhibited GSK-3ß activation triggered by ethanol.	info:pmid/18190791#body:77
ethanol ---> GSK3B		Regulation	These myocardial functional and mitochondrial changes following acute ethanol challenge may be underscored by ALDH2 knockout-induced amplification of ethanol-elicited inhibition of Akt-GSK3ß activation.	info:pmid/20362583#body:92
ethanol ---> GSK3B		Regulation	Because ethanol activates glycogen synthase kinase 3ß in developing cerebellum and in cerebellar granule neurons (Luo, 2009), it might lead to reduction in Nrf2 levels in the nucleus.	info:pmid/21697273#cont:358
ethanol ---> GSK3B		Regulation	It is interesting to note that whereas chronic ethanol induces GSK3B activity by inhibiting its phosphorylation in the rat livers , acute ethanol seems to inhibit GSK3B activity by inducing its phosphorylation at Ser9 in the mice livers , suggesting that alcohol effects on GSK3B activity status could be dependent on the duration of alcohol exposure.	info:pmid/23880292#body:127
ethanol ---> GSK3B		Regulation	In vivo studies of the effects of acute ethanol exposure on the adult nervous system have been rare, and while previous studies have shown links between ethanol exposure and activity-dependent neuron death, or between Glycogen synthase kinase 3ß and excitotoxicity ( ), to our knowledge, ours is the first work to link activity-dependent or excitotoxic death, ethanol-induced neuronal apoptosis, and…	info:pmid/19647018#body:186
ethanol ---> GSK3B		Regulation	In utero exposure to alcohol reduces GSK-3ß and increases cytosolic Nrf2 protein levels in the fetal brain.	info:doi/10.1016/j.ajog.2011.10.069#body:13
ethanol ---> GSK3B		Regulation	Ethanol may enhance the apoptotic pathway by activating GSK-3ß, and by suppressing pro-survival kinases, such as ERK ( ), Akt, and AMPK ( ).	info:doi/10.1016/j.neuroscience.2011.12.059#body:208
ethanol --+> HSPA8		Expression	In comparison with ethanol, propanol and butanol caused proportionally greater increases in Hsc70 mRNA.	info:pmid/1989992#abs:8
ethanol --+> HSPA8		Expression	Ethanol (5 g/kg) increased the level of hsc73 and grp78 messenger ribonucleic acids and related proteins in the liver.	info:pmid/10630603#abs:9
ethanol --+> HSPA8		Expression	Previously we found that ethanol increases expression of the constitutive 70-kDa heat shock protein (Hsc70) in NG108-15 neuroblastoma x glioma cells.	info:pmid/7969074#abs:1
ethanol --+> HSPA8		Expression	These results suggest that ethanol may affect embryonic brain development by decreasing HSP73 expression level as well as inhibiting neuronal differentiation and proliferation during the organogenic period.	info:pmid/15251177#abs:5
ethanol --+> HSPA8		Expression	Ethanol could induce and regulate HSC70 and GRP78 genes transcription.	info:pmid/22960394#body:147
ethanol --+> HSPA8		Expression	Ethanol regulates Hsc70 abundance by increasing the rate ofhsc70 transcription (Miles et al., 1991).	info:pmid/10604945#body:47
ethanol --+> HSPA8		Expression	Miles and colleagues investigated ethanol-induced changes in heat shock cognate protein 70 ( Hsc70, also known as Hsp73) gene expression in neuroblastoma-glioma hybrid cells (NG108-15 cells).	info:pmid/19781570#body:96
ethanol --+> HSPA8		Expression	Possibly incubation of cultured cells with less ethanol for longer periods would be effective, as observed for ethanol-induced increases in Hsc70 heat shock protein gene expression in NG108-15 cells ( ).	info:pmid/21781791#body:96
ethanol --+> HSPA8		Expression	Together with some earlier candidate gene studies , this work showed that ethanol induced the expression of several molecular chaperones, including GRP78, GRP94, and Hsc70 (Hsc73), that are thought to provide crucial functions in protein trafficking.	info:pmid/11916533#body:41
ethanol --+> HSPA8		Expression	Quantitative analysis of data obtained in Northern hybridizations of 20 µg of total RNA from controls and from ethanol-treated groups showed that 25 mM ethanol already resulted in a significant up-regulation of HSC70 mRNA and GRP78 mRNA ( P<.05, n=4) (see ).	info:pmid/11557303#body:112
ethanol --+> HSPA8		Expression	A very recent pathway-focused microarray analysis revealed that chronic application of alcohol to mouse cortical neurons for 5 d increases the expression of several heat shock proteins (Hsp70, Hspa8, and Hsp84) together with some of the components of the platelet-derived growth factor pathway (Wang et al., 2007[Go]).	info:pmid/18032669#body:335
ethanol ---> SLC2A1		Expression	Ethanol increased the uptake of monosaccharides and the protein levels of GLUT1 but decreased those of mannosidase II.	info:pmid/12390522#abs:7
ethanol ---> SLC2A1		Expression	not affect the GLUT1 protein level (Fig. 2b), which was due to stabilization of GLUT1 mRNA levels by ethanol exposure.	info:pmid/21079922#cont:229
ethanol ---> SLC2A1		Expression	Results from reverse transcription-polymerase chain reaction demonstrated that gene expressions of IGF-1 and GLUT 1 were down-regulated significantly in medium (20 mg/egg) and high (40 mg/egg) dose ethanol of groups ( B and C).	info:pmid/23907025#body:106
ethanol ---| SLC2A1		DirectRegulation	Ethanol, diazepam, and chloralhydrate significantly inhibited GLUT1 function.	info:pmid/12548383#abs:8
ethanol ---| SLC2A1		DirectRegulation	Exposure to 50 and 100 mM of ethanol for 5 hr induced dose-dependent reductions in GLUT1 and GLUT3 protein.	info:pmid/8749801#abs:5
ethanol ---| SLC2A1		DirectRegulation	Indirect immunofluorescence and immunoperoxidase staining showed marked reduction of the GLUT1 glucose transporter by exposure to 100 mM ethanol for 5 or 18 hours, but no obvious change in response to 50 mM ethanol.	info:pmid/8979253#abs:3
ethanol ---| SLC2A1		DirectRegulation	The main effect on resting muscle was the increase in glucose uptake, probably produced by ethanol in the membrane and the activation of certain membrane systems such as the transporters GLUT-1 and GLUT-4.	info:pmid/15922140#body:136
ethanol ---| SLC2A1		DirectRegulation	Some barbiturates, anesthetics, methylxanthines, ethanol, tricyclic antidepressants, tyrosine kinase inhibitors, and antiepileptics can inhibit glucose transporter 1 at high concentrations in vitro; however, the clinical relevance of these findings is unclear.27	info:pmid/23588303#cont:576
ethanol ---| SLC2A1		DirectRegulation	Pharmacological agents that affect GLUT expression in the developing chick brain include nicotine that decreases expression of the 55 kDa GLUT1 isoform and ethanol that decreases the 45 kDa GLUT1 isoform, with neither treatment producing changes in GLUT3 expression in ovo .	info:pmid/18498935#body:48
ethanol ---| SLC2A1		DirectRegulation	Other studies have revealed that a single embryonic exposure to alcohol affected in aged mice the distribution of the glucose transporter (GLUT-1) in the olfactory bulb, in the vascular endothelium of the cerebral cortex, in the hippocampus, and in the cerebellum ( ).	info:pmid/20382450#body:8
ethanol ---> SLC2A1		MolTransport	Ethanol increased the uptake of monosaccharides and the protein levels of GLUT1 but decreased those of mannosidase II.	info:pmid/12390522#abs:7
ethanol ---> SLC2A1		MolTransport	We also determined the ethanol sensitivity of various cloned human facilitative glucose transporters expressed in Chinese hamster ovary cells and we found that ethanol inhibits hexose uptake by GLUT1 but not uptake by GLUT3 or GLUT4 transporters.	info:pmid/8022421#abs:6
ethanol ---> GCK		Expression	Incubation of Saccharomyces cerevisiae with xylose and ethanol for 16 hours leads to a decrease of hexokinase (and glucokinase) activity in the cells.	info:pmid/3533151#abs:1
ethanol ---> GCK		Expression	Ethanol perfusion decreased the levels of phosphofructokinase, glucokinase and cytosolic isocitrate dehydrogenase, while avenaciolide lowered pyruvate carboxylase and phosphoenolpyruvate carboxykinase as well as glucokinase.	info:pmid/949510#abs:4
ethanol ---> GCK		Expression	Specific blockade of ATF3 using siRNA or C-terminally deleted ATF3(?C) attenuated ethanol-induced pancreatic ß-cell apoptosis or dysfunction and restored the down-regulation of glucokinase (GCK), insulin, and pancreatic duodenal homeobox-1 induced by ethanol.	info:pmid/20855893#abs:4
ethanol --+> SP1		Expression	Expression of both Sp1 and NFkappaBialpha were also downregulated following chronic ethanol treatment.	info:pmid/16594979#abs:11
ethanol --+> SP1		Expression	These results suggest that free fatty acid and ethanol may increase endoplasmic reticulum stress and lead to nuclear nuclear factor-?B activation and TG2 induction through respectively distinctive pathways, leading to TG2-mediated apoptosis via cross-linking and inactivation of Sp1 and reduction in c-Met.	info:pmid/21525755#abs:7
ethanol --+> SP1		Expression	How ethanol might act to increase transcription through Sp1 is, at present, unknown.	info:pmid/10604945#body:303
ethanol --+> SP1		Expression	Though ethanol appeared to inhibit SP1 expression, when compared to saline-injected cerebellum, the result did not reach statistical significance.	info:pmid/16806122#body:32
ethanol --+> SP1		Expression	Thus, our observation suggested that direct inhibition of JNK MAPKs and upstream inhibition of Src are of importance for the alcohol-elicited, transcriptional activity of STAT3 and specificity protein-1.	info:pmid/17575268#body:260
ethanol --+> SP1		Expression	In addition, it has been suggested that ethanol increases the activity of transcription factors and STAT3, specificity protein-1 (Sp1), and activator protein 1, thereby up-regulating IL-10 expression in human monocytes (38).	info:pmid/23592778#cont:268
ethanol --+> SP1		Expression	It should be noted that moderate alcohol exposure may only affect membrane fluidity, leading to more active membrane-bound protein kinase C that would yield increased Sp1 binding, while heavy alcohol exposure may lead to reduced Sp1 binding, thus reducing PON1 transcription, and/or reduced PON1 mRNA stability.	info:pmid/14564680#body:168
ethanol --+> SP1		Expression	These conclusions are supported by several lines of evidence including that (1) TG2 overexpression results in apoptosis, Sp1 cross-linking, and inactivation, effects that can be mimicked by small interfering RNA-induced Sp1 knockdown and rescued by TG2 knockout or knockdown, or by Sp1 overexpression, (2) apoptosis induced by ethanol or Jo2 treatment is accompanied by TG2-dependent Sp1 cross-linki…	info:pmid/19208340#body:102
ethanol ---| UGDH		Regulation	Ethanol (100 mM) partially inhibited UDPGDH activity assayed at low, but not high, UDP-glucose concentrations, supporting the conclusion that at least E(H) activity is not due to ADH.	info:pmid/16453102#abs:9
ethanol ---| UGDH		Regulation	The mechanism is likely to be inhibition of UDP-glucose dehydrogenase activity by ethanol from increased intracellular NADH/NAD ratio accompanying ethanol oxidation.	info:pmid/3795046#abs:10
ethanol ---| UGDH		Regulation	The microarray results obtained in this study revealed, for the first time, that several genes, including beta-glucuronidase, UDP-glycosyltransferase 1, UDP-glucose dehydrogenase, apoC-III, and gonadotropin-releasing hormone receptor, were regulated by chronic ethanol exposure in the rat liver.	info:pmid/17920746#abs:7
ethanol ---| UGDH		Regulation	Because ethanol is known to inhibit uridine diphosphate-glucose dehydrogenase [56], which is responsible for the conversion of uridine diphosphate-glucose to uridine diphosphate-glucuronide and which is in turn used by UGT1A4 in the glucuronide conjugation of retigabine, the authors suggest ethanol inhibits the metabolism of retigabine via this mechanism.	info:pmid/23794036#cont:323
ethanol ---> PGK1		Expression	On the other hand, the level of PGK1 mRNA was hardly changed by the treatment with heat shock or ethanol stress.	info:pmid/18442359#body:115
ethanol ---> PGK1		Expression	The ethanol yield on 4% xylose obtained by the engineered yeast from this study was low (0.23g ethanol/g xylose), which could be due to the lack of glucose to fully activate the PGK1 promoter used in the xylA construction as well as to increase the carbon flux through glycolysis.	info:pmid/23186665#body:52
SLC2A1 ---> ER unfolded protein response		Regulation	Previous publications have suggested that GLUT1 may modulate the endoplasmic reticulum stress response.	info:pmid/20051957#body:250
ABCC8 --+> metabolic stress		Regulation	This is supported by the observation that analogous mutations in the SUR1 isoform abolished the effect of ADP, but only reduced the action of openers or metabolic stress on channel activity (27) .	info:pmid/11023978#body:241
SP1 ---> CDH5		PromoterBinding	Supershift assays with antibodies against proteins of the Sp1 family revealed that Sp1 and Sp3 interact with this region of the VE cadherin promoter.	info:pmid/9506975#abs:7
SP1 ---> CDH5		PromoterBinding	PlGF-1 promotes VE-cadherin expression via the trans-activating Sp1 and Sp3 interaction with the VE-cadherin promoter and subsequently stabilizes transendothelial junctions, but only after activation of endothelial cells by VEGF.	info:pmid/21464949#abs:4
SP1 ---> CDH5		PromoterBinding	Sp1, TAL-1, and the ETS family of transcription factors bind to and enhance VE-cadherin promoter activity (49 –51).	info:pmid/24106276#cont:325
SP1 ---> CDH5		PromoterBinding	Supershift assays with antibodies against proteins of the Sp1 family revealed that Sp1 and Sp3 interact with this region of the VE cadherin promoter.	info:pmid/9506955#body:29
ABCC8 ---- GCK		Binding	... sulfonylurea receptor gene (SUR1) (2) or the SUR-associated, inward-rectifying, potassium channel (subunit KATPir6.2) (3) as well as autosomal dominant ...	info:pmid/10487673#body:63
GCK ---> SLC2A1		ProtModification	There is now strong evidence that in most of these cells, extracellular glucose is carried into the cytosol by GLUT, phosphorylated by glucokinase, and subsequently metabolized to generate ATP, which closes membrane ATP-sensitive K+ channels (KATP channels) and so electrically excites the cell (7,8,10).	info:pmid/18591392#body:59
GCK ---> SLC2A1		Expression	As with the glucokinase gene, the transcription factors mediating the effects of insulin via PKB on the expression of SREBP and GLUT-1 are not yet known, whereas upstream stimulatory factor has been implicated in mediating the effects of insulin on FAS gene expression (58).	info:pmid/14612449#body:256
GCK ---> SLC2A1		Expression	Although Glut1 expression increased by 58% and Glut2 and glucokinase expression decreased by 31 and 23%, respectively, in hypovascular islets (Fig. 4A and B), in vitro glucose utilization and oxidation were similar, with the exception of a significant increase in glucose utilization at 20 mmol/L glucose in islets, isolated from Doxycline-treated animals (Fig. 4C and D).	info:pmid/23974922#cont:163
DHFR ---- HSPA8		Binding	Co-precipitation with Hop TPR1 showed that prePiC-DHFR was clearly bound by Hsc70, whereas preCIC-DHFR was not bound above background levels (Figure 4).	info:pmid/19143589#body:166
DHFR ---> GSK3B		Regulation	To our knowledge, this is the first report of modulation of GSK3 activity by inhibition of DHFR.	info:pmid/19727391#body:249
ethanol --+> HSPD1		Regulation	Heat stress strikingly induced HSP70 (Fig. 4 C, lane 2), while ethanol and diamide mainly induced HSP60 (Fig. 4 D, lanes 3 and 5).	info:pmid/8636403#body:220
ethanol --+> HSPD1		Regulation	We noted that two genes (S100A4 and MME) are up regulated in the condition of 1 nM R1881 but down regulated in the ethanol condition comparing to the MOCK control, and one gene HSPD1 is up-regulated in the condition of 10 nM R1881 but down regulated in ethanol.	info:pmid/19668381#body:151
ethanol ---| LTF		MolTransport	Ethanol (200 mM) blocked both H202 and lactoferrin release, suggesting the involvement of the phospholipase D pathway.	info:pmid/8975881#abs:11
ethanol ---| LTF		MolTransport	Similarly, ethanol treatment completely blocked H2O2 and lactoferrin release, and the second phase of diradylglycerol formation.	info:pmid/8132530#abs:10
ethanol ---| LTF		MolTransport	Ethanol significantly inhibited lactoferrin, HGF, and MPO degranulation in a concentration-dependent manner.	info:pmid/12488495#body:130
HSPD1 --+> ER unfolded protein response		Regulation	The presence of OTCD in mitochondria and the associated induction of mitochondrial CPN60 demonstrated induction of mitochondrial unfolded protein response in the transfected cells.	info:pmid/21997551#cont:120
GSK3B ---> ER unfolded protein response		Regulation	An emerging role for GSK-3ß is regulation of endoplasmic reticulum stress response.	info:pmid/23108649#cont:8
HSPD1 ---| GSK3B		Regulation	Moreover, Hsp60 impaired insulin-stimulated phosphorylation of GSK3a and GSK3b (Fig. 5B and C).	info:pmid/22315307#cont:137
HSPA8 --+> Diabetes, Autoimmune		Regulation	Transgenic expression of Hsc70 in pancreatic islets enhances autoimmune diabetes in response to beta cell damage.	info:pmid/19812207#title:1
HSPA8 --+> Diabetes, Autoimmune		Regulation	Transgenic expression of Hsc70 in pancreatic islets enhances autoimmune diabetes in response to beta cell damage.	info:pmid/20668291#cont:171
HSPD1 --+> FKBP1A		Regulation	On the contrary, the DNA-binding response regulator [A9M2D6], involved in the transcription, the trigger factor [A1KUE0] involved in protein export, the 60 kDa chaperonin [A1KW52], that prevents misfolding and promotes the refolding of polypeptides, and the peptidyl-prolyl cis-trans isomerase [A9M3M5], which accelerates the folding of proteins, were down-expressed.	info:pmid/20868485#cont:117
GSK3B ---- HSPA8		Binding	Similarly, HSPA8 interacted with GSK3b resulting in little over twofold increase in the reporter activity (Figure 6b(II)).	info:pmid/22266849#cont:363
GSK3B ---| TUBA1A		Regulation	(A) Intravitreal injection of GSK-3ß inhibitor induces GFP, ß-catenin, and cell proliferation in the uninjured retina of 1016 tuba1a:gfp transgenic fish.	info:pmid/21911394#cont:179
ABCC8 ---- HSPA8		Binding	During the biogenesis of KATP channels, it has recently been shown that SUR1 can interact with heat shock cognate 70, heat shock protein 90, and heat shock protein40 (17).	info:pmid/21411514#cont:128
HSPD1 --+> CDH5		Expression	Immunostaining demonstrated that Cpn60.1 inhibits VCAM-1 and increases vascular endothelial-cadherin expression in lung vascular tissue, suggesting that the antiinflammatory effect of Cpn60.1 is partly mediated by altering the expression of adhesion molecules.	info:pmid/22447969#abs:8
HSPD1 ---- LTF		Binding	Bovine lactoferrin binds to a 60 kDa heat shock protein of Helicobacter pylori.	info:pmid/9116643#abs:1
HSPD1 ---- LTF		Binding	It is not known if this is related to the report that the cell surface Cpn60 of H. pylori binds to lactoferrin, which might have effects on cell growth (Amini et al. 1996).	info:pmid/22143554#cont:346
LTF ---> GSK3B		Regulation	We demonstrated for the first time that Lactoferrin, irrespective of the iron saturation can increase phosphorylation of Dishevelled 2, Gsk3b, and ...	info:pmid/23270517#cont:197
ethanol ---> TUBA1A		Regulation	Moreover, Tuba1a and Gapdh housekeeping genes were modulated by ethanol during differentiation and were replaced by a set of ribosomal genes with stable expression.	info:pmid/23724002#abs:8
SLC35B4 --+> UDP-glucose		MolTransport	An increased rate of UDP-glucose release in ymd8Delta was reduced by deletion of the YEA4 UDP- N-acetylglucosamine or the HUT1 UDP-galactose transporters, and overexpression of YEA4 or HUT1 increased the rate of UDP-glucose release.	info:pmid/18693752#abs:9
HSPA8 ---| PGK1		Regulation	Relative to normal corneal epithelial proteins, six keratoconus epithelial proteins (lamin-A/C, keratin type I cytoskeletal 14, tubulin beta chain, heat shock cognate 71 kDa protein, keratin type I cytoskeletal 16 and protein S100-A4) exhibited up-regulation and five proteins (transketolase, pyruvate kinase, 14-3-3 sigma isoform, phosphoglycerate kinase 1, and NADPH dehydrogenase (quinone) 1) sho…	info:pmid/21281627#abs:5
HSPA8 ---> E2F1		ProtModification	This suggests that E2F1 could be a substrate for Hsc70 recruited by T antigen to an Rb family member.	info:pmid/16734427#abs:10
GCK ---- HSPD1		Binding	Co-immunoprecipitation results revealed that heat shock protein 60 (HSP60) could interact with ATP-glucokinase and ADP-glucokinase at 60 and 75°C, whereas at 80°C, the interaction was only effectively with ADP-glucokinase but not ATP-glucokinase.	info:pmid/24058911#abs:6
ethanol --+> CDH5		Regulation	Ethanol induced the endocytosis of VE-cadherin and the effect was blocked by jasplakinolide.	info:pmid/22331491#abs:11
SP1 --+> E2F1		PromoterBinding	Gel mobility shift assays with multiple oligonucleotides and protein antibodies (for supershifts) showed that the -146 to -54 region of the E2F1 gene promoter bound Sp1 and NF-Y proteins in MCF-7 cells.	info:pmid/10446910#abs:3
SP1 --+> E2F1		PromoterBinding	Using chromatin immunoprecipitation experiments, we showed that COUP-TFII directly regulates the expression of E2F1 through tethering to the Sp1 binding sites in the promoter of E2F1 to modulate cell proliferation.	info:pmid/22734039#abs:5
SP1 --+> E2F1		PromoterBinding	The contributions of individual Sp proteins to basal and E(2)-induced activity were promoter dependent. inhibitory RNAs for Sp1, inhibitory RNAs for Sp1 , Sp3, and iSp4 also significantly inhibited hormonal induction of E(2)F1, CAD, and RAR alpha mRNA levels; however, the enhanced inhibitory effects of the latter two small inhibitory RNAs suggest that Sp3 and Sp4 play a major role in estrogen rec…	info:pmid/17909268#abs:4
SP1 --+> E2F1		PromoterBinding	Sp1 and Sp3 bind the GC box in the E2F1 promoter.	info:pmid/9218478#body:199
SP1 --+> E2F1		PromoterBinding	Multiple SP1 sites, CCAAT motifs, and E2F1 binding sites have been identified in human E2F1 promoter (33, 34).	info:pmid/12947120#body:228
SP1 --+> E2F1		PromoterBinding	... E2F-1 Promoter The E2F-1 promoter contains binding sites for the specificity protein 1 (Sp1), metal regulatory element-binding factor (MBF-1), and ...	info:pmid/12511608#body:147
SP1 --+> E2F1		PromoterBinding	However, our experiments demonstrated that the E2F1 binding site is not required for recruitment of E2F1 to the SRC-3 promoter and for the activation of the ...	info:pmid/16916939#body:294
SP1 --+> E2F1		PromoterBinding	Gel mobility shift assays exhibit similar patterns of Sp1 and NFYA binding to the proximal region of the E2F-1 gene promoter in MCF-7 and ZR-75 cells (Figs. ...	info:pmid/12697671#body:240
SP1 --+> E2F1		PromoterBinding	The E2F1 promoter consists of multiple DNA elements, including binding sites for E2F, SP1, and CBF transcription factors, that regulate repression of the promoter in G0 and activation in S phase.	info:pmid/10660616#body:322
SP1 --+> E2F1		PromoterBinding	Moreover, since the in vitro association of E2F1 and Sp1 has been shown to be mediated through the C-terminal domain of Sp1 (36, 46), and because the same region in Sp1 involves interaction with PML (see above), the possible interaction of PML and E2F1 was also examined.	info:pmid/9819401#body:221
SP1 --+> E2F1		PromoterBinding	Previous studies have reported that ERa/Sp1 and NFYA interactions with GC-rich and CCAAT sites, respectively, were necessary for induction of E2F1 in MCF-7 cells (34); however, these interactions were not required for hormone activation of p53-10 (Fig. 2).	info:pmid/12145335#body:232
SP1 --+> E2F1		PromoterBinding	This is supported by the additive, rather than cooperative, binding of Sp1 to the different GC-sites in the bcl-2, E2F1 or progesterone receptor promoter .	info:pmid/18206366#body:170
